# Supplementary material for: Epigenetic Regulation of A Heat-Activated Retrotransposon in Cruciferous Vegetables
Source: Preprints.org preprint supplement (doi:10.20944/preprints201705.0022.v1), 2017-05-02
Supplement: Supplementary file 1 [file Supplementary Figure 2.docx]

>Chinese colza1

ACATGGGAGTTAGCTTCACTTCCAAATGGACACAAGGCAATTGGTGTGAAGTGGGTGTACAAGGCAAAGAAGAACTCTAAAGGAGAAGTTGAAAGGTACAAGGCAAGATTGGTGGCAAAAGGCTATAGTCAAAGAGCCGGGATCGACTATGATGAGGTATTTGCTCCAGTTGCTCGCTTAGAAACGGTTAGACTAATCATTTCATTGGCAGCCCAAAAGAGTTGGAGGATACATCAAATGGATGTAAAATCAGCCTTCTTAAATGGAGACCTTGAAGAAGAAGTCTACATTGAGCAACCACAAGGCTACATAGTCAAAGGAGAAGAAGACAAAGTCTTAAGGCTGAAGAAGGCGCTTTATGGATTAAAGCAAGCACCAAGAGCATG-AACACTCGGATTGATAAGTACTTCAAGGAGAAAGGCTTCATCAAGTGTCCATATGAGCATGCACTTTATATCAAAACTCAAAACAATGATATATTGATTGCATGTTTATATGTTGATGACTTGATATTCACTGGCAACAATCCGATTATGTTTGAAGATTTCAAGATGGAGATGACAAAAGAGTTCGAGATGACCGACATTGGACTAATGTCATACTACCTTGGCATTGAAGTAAAGCAGGAAGAAAATGGAATCTTCATTACTCAAGAAGGCTATGCAAAAGAGGTGCTTAAGAAGTTCAAGATGGATGACTCAAATCCAGTTTGCACGCCAATGGAATGTGGAGTCAAGTTGTCAAAGG

>Chinese colza2

ACATGGGAGTTAGCTTCACTTCCAAATGGACACAAGGCAATTGGTGTGAAGTGGGTGTACAAGGCAAAGAAGAACTCTAAAGGAGAAGTTGAAAGGTACAAGGCAAGATTGGTGGCAAAAGGCTATAGTCAAAGAGCCGGGATCGACTATGATGAGGTATTTGCTCCAGTTGCTCGCTTAGAAACGGTTAGACTAATTATTTCATTGGCAGCCCAAAAAAGTTGGAGGATACATCAAATGGATGTAAAATCAGCCTTCTTAAATGGAGACCTTGAAGAAGAAGTCTACATTGAGCAACCACAAGGCTACATAGTCAAAGGAGAAGAAGACAAAGTCTTAAGGCTGAAGAAGGCGCTTTATGGATTAAAGCAAGCACCAAGAGCATGGAACACTCGGATTGATAAGTACTTCAAGGAGAAAGACTTCATCAAGTGTCCATATGAGCATGCACTTTATATCAAAACTCAAAACAATGATATATTGATTGCATGCTTATATGTTGATGACTTGATATTCACTGGCAACAATCCGATTATGTTTGAAGACTTCAAGATGGAGATGACAAAGGAGTTCGAGATGACCGACATTGGATTAATGTCATACTACCTTGGCATTGAAGTAAAGCAAGAAGAAAATGGAATCTTCATTACTCAAGAAGGCTATGCAAAAGAGGTGCTTAAGAAGTTCAAGATGAATGACTCAAATCCAGTTTGCACGCCAATGGAATGTGGAGTCAAGTTGTCAAAGG

>Chinese colza3

ACATGGGAGTTAGCTTCACTTCCAAAAGGACACAAGGCAATTGGTGTGAAGTGGGTGTACAAGGCAAAGAAGAACTCTAAAGGAGAAGTTGAAAGGTACAAGGCAAGATTGGTGGCAAAAGGCTATAGTCAAAGAGCCGGGATCGACTATGATGAGGTATTTGCTCCAGTTGCTCGCTTAGAAACGGTTAGACTAATCATTTCATTGGCAGCCCAAAAGAGTTGGAGGATACATCAAATGGATGTAAAATCAGCCTTCTTAAATGGAGACTTTGAAGAAGAAGTCTACATTGAGCAACCACAAGGCTACATAGTCAAAGGAGAAGAAGACAAAGTCTTAAGGCTGAAGAAGGCGCTTTATGGATTAAAGCAAGCACCAAGAGCGTGGAACACTCGGATTGATAAGTACTTCAAGGAGAAAGGCTTCATCAAGTGTCCATATGAGCATGCACTTTATATCAAAACTCAAAACAATGATATATTGATTGCATGCTTATATGTTGATGACTTGATATTCACTGGCAACAATCCGATTATGTTTGAAGATTTCAAGATGGAGATGACAAAAGAGTTTGAGATGACCGACATTGGACTAATGTCATACTACCTTGGCATTGAAGTAAAGCAAGAAGAAAATGGAATCTTCATTACTCAAGAAGGCTATGCAAAAGAGGTGCTTAAGAAATTCAAGATGGATGACTCAAATCCAGTTTGCACGCCAATGGAATGTGGAGTCAAGTTGTCAAAGG

>Chinese colza4

ACATGGGAGTTAGCTTCACTTCCAAATGGACACAAGGCAATTGGTGTGAAGTGGGTGTACAAGGCAAAGAAGAACTCTAAAGGAGAAGTTGAAAGGTACAAGGCAAGATTGGTGGCAAAAGGCTATAGTCAAAGAGCCGGGATCGACTATGATGAGGTATTTGCTCCAGTTGCTCACTTAGAAACGGTTAGACTAATCATTTCATTGGCAGCCCAAAAGAGTTGGAGGATACATCAAATGGATGTAAAATCAGCCTTCTTAAATAGAGACCTTGAAGAAGAAGTCTACATTGAGCAACCACAAGGCTACATAGTCAAAGGAGAAGAAGACAAAGTCTTAAGGCTGAAGAAGGCGCTTTATGGATTAAAGCAAGCACCAAGAGCGTGGAACACTCGGATTGATAAGTACTTCAAGGAGAAAGGCTTCATCAAGTGTCCATATGAGCATGCACTTTATATCAAAACTCAAAACAATGATATATTGATTGCATGCTTATATGTTGATGACTTGATATTCACTGGCAACAATCCGATTATGTTTGAAGACTTCAAGATGGAGATGACAAAGGAGTTCGAGATGACCGACATTGGATTAATGTCATACTACCTTGGCATTGAAGTAAAGCAAGAAGAAAATGGAATCTTCATTACTCAAGAAGGCTATGCAAAAGAGGTGCTTAAGAAGTTCAAGATGAATGACTCAAATCCAGTTTGCACGCCAATGGAATGTGGAGTCAAGTTGTCAAAGG

>Chinese colza5

ACATGGGAGTTAGCTTCACTTCCAAATGGACACAAGGCAATTGGTGTAAAGTGGGTGTACAAGGCAAAGAAGAACTCTAAAGGAGAAGTTGAAAGGTACAAGGCAAGATTGGTGGCAAAAGGTTATAGTCAAAGAGCCGGGATCGACTATGATGAGGTATTTGCTCCAGTTGCTCGCTTAGAAACGGTTAGACTAATCATTTCATTGGCAGCCCAAAAGAGTTGGAGGATACATCAAATGGATGTAAAATAAGCCTTCTTAAATGGAGACCTTGAAGAAGAAGTCTACATTGAGCAACCAGAAGGCTACATAGTCAAAGGAGAAGAAGACAAAGTTTTAAGGCTGAAGAAGGCGCTTTATGGATTAAAGCAAGCACCAAGAGCATGGAACACTCGGATTGATAAGTACTTCAAGGAGAAAGGCTTCATCAAGTGTCCATATGAGCATGCACTTTATGTCAAAACTCAAAACAATGATATATTGATTGCATGCTTATATGTTGATGACTTGATATTCACTGGCAACAATCCGATTATGTTTGAAGATTTCAAGATGGAGATGACAAAGGAGTTCGAGATGACCGACATTGGATTAATGTCATACTACCTTGGCATTGAAGTAAAGCAAGAAGAAAATGGAATCTTCATTACTCAAGAAGGCTATGCAAAAGAGGTGCTTAAGAAGTTCAAGATGAATGATTCAAATCCAGTTTGCACGCCAATGGAATGTGGAGTCAAGTTGTCAAAGG

>Chinese colza6

ACATGGGAGTTAGCCTCACTTCCAAATGGACACAAGGCAATTGGTGTGAAGTGGGTGTACAAGGCAAAGAAGAACTCTAAAGGAGAAGTTGAAAGGTACAAGGCAAGATTGGTGGCAAAAGGCTATAGTCAAAGAGCCGGGATCGACTATGATGAGGTATTTGCTCCAGTTGCTCGCTTAGAAACGGTTAGACTAATCATTTCATTGGCAGCCCAAAAGAGTTGGAGGATACATCAAATGGATGTAAAATCAGCCTTCTTAAATGGAGACCTTGAAGAAGAAGTCTACATTGAGCAACCACAAGGCTACATAGTCAAAGGAGAAGAAGACAAAGTCTTAAGGCTGAAGAAGGCGCTTTATGGATTAAAGCAAGCACCAAGAGCGTGGAACACTCGGATTGATAAGTACTTCAAGGAGAAAGGCTTCATCAAGTGTCCATATGAGCATGCACTTTATATCAAAACTCAAAACAATGATATATTGATTGCATGCTTATATGTTGATGACTTGATATTCACTGGCAACAATCCGATTATGTTTGAAGATTTCAAGATGGAGATGACAAAAGAGTTCGAGATGACCGACATTGGACTAATGTCATACTACCTTGGCATTGAAGTAAAGCAAGAAGAAAATGGAATCTTCATTACTCAAGAAGGCTATGCAAAAGAGGTGCTTAAGAAGTTCAAGATGGATGACCCAAATCCAGTTTGCACGCCAATGGAATGTGGAGTCAAGTTGTCAAAGG

>Chinese colza7

ACATGGGAGTTAGCTTCACTTCCAAATGGACACAAGGCAATTGGTGTGAAGTGGGTGTACAAGGCAAAGAAGAACTCTAAAGGAGAAGTTGAAAGGTACAAGGCAAGATTGGTGGCAAAAGGCTATAGTCAAAGAGCCGGGATCGACTATGATGAGGTATTTGCTCCAGTTGCTCGCTTAGAAACGGTTAGACTAATCATTTCATTGGCAGCCCAAAAGAGTTGGAGGATACATCAAATGGATGTAAAATCAGCCTTCTTAAATGGAGACCTTGAAGAAGAAGTCTACATTGAGCAACCACAAGGCTACATAGTCAAAGGAGAAGAAGACAAAGTCTTAAGGCTGAAGAAGGCGCTTTATGGATTAAAGCAAGCACCAAGAGCGTGGAACACTCGGATTGATAAGTACTTCAAGGAGAAAGGCTTCATCAAGTGTCCATATGAGCATGCACTTTATATCAAAACTCAAAACAATGATATATTGATTGCATGCTTATATGTTGATGACTTGATATTCACTGGCAACAATCCGATTATGTTTGAAGATTTCAAGATGGAGATGACAAAAGAGTTCGAGATGACCGACATTGGACTAATGTCATACTATCTTGGCATTGAAGTAAAGCAAGAAGAAAATGGAATCTTCATTACTCAAGAAGGCTATGCAAAAGAGGTGCTTAAGAAATTCAAGATGGATGACTCAAATCCAGTTTGCACGCCAATGGAATGTGGAGTCAAGTTGTCAAAGG

>Chinese colza8

ACATGGGAGTTAGCTTCACTTCCAAATGGACACAAGGCAATTGGTGTGAAGTGGGTGTACAAGGCAAAGAAGAACTCTAAAGGAGAAGTTGAAAGGTACAAGGCAAGATTGGTGGCAAAAGGCTATAGTCAAAGAGCCGGGATCGACTATGATGAGGTATTTGCTCCAGTTGCTCGCTTAGAAACGGTTAGACTAATCATTTCATTGGCAGCCCAAAAGAGTTGGAGGATACATCAAATGGATGTAAAATCAGCCTTCTTAAATGGAGACCTTGAAGAAGAAGTCTACATTGAGCAACCACAAAGCTACATAGTCAAAGGAGAAGAAGACAAAGTCTTAAGGCTGAAGAAGGCGCTTTATGGATTAAAGCAAGCACCAAGAGCGTGGAACACTCGGATTGATAAGTACTTCAAGGAGAAAGGCTTCATCAAGTGTCCATATGAGCATGCACTTTATATCAAAACTCAAAACAATGATATATTGATTGCATGCTTATATGTTGATGACTTGATATTCACTGGCAACAATCCGATTATGTTTGAAGATTTCAAGATGGAGATGACAAAAGAGTTCGAGATGACCGACATTGGACTAATATCATACTACCTTGGCATTGAAGTAAAGCAAGAAGAAAATGGAATCTTCATTACTCAAGAAGGCTATGCAAAAGAGGTGCTTAAGAAATTCAAGATGGATGACTCAAATCCAGTTTGCACGCCAATGGAATGTGGAGTCAAGTTGTCAAAGG

>Chinese colza10

ACATGGGAGTTAGCTTCACTTCCAAATGGACACAAGGCAATTGGTGTGAAGTGGGTGTACAAGGCAAAGAAGAACTCTAAAGGAGAAGTTGAAAGGTACAAGGCAAGATTGGTGGCAAAAGGCTATAGTCAAAGAGCCGGGATCGACTATGATGAGGTATTTGCTCCAGTTGCTCGCTTAGAAACGGTTAGACTAATCATTTCATTGGCAGCCCAAAAGAGTTGGAGGATACATCAAATGGATGTAAAATCAGCCTTCTTAAATGGAGACCTTGAAGAAGAAGTCTACATTGAGCAACCACAAGGCTACATAGTCAAAGGAGAAGAAGACAAAGTCTTAAGGCTGAAGAAGGCGCTTTATGGATTAAAGCAAGCACCAAGAGCATGGAACACTCGGATTGATAAGTACTTCAAGGAGAAAGGCTTCATCAAGTGTCCATATGAGCATGCACTTTATATCAAAACTCAAAACAATGATATATTGATTGCATGCTTATATGTTGATGACTTGATATTCACTGGCAACAATCCGATTATGTTTGAAGACTTCAAGATGGAGATGACAAAGGAGTTCGAGATGACCGACATTGGATTAATGTCATACTACCTTGGCATTGAAGTAAAGCAAGAAGAAAATGGAATCTTCATTACTCAAGAAGGCTATGCAAAAGAGGTGCTTAAGAAGTTCAAGATGAATGACTCAAATCCAGTTTGCACGCCAATGGAATGTGGAGTCAAGTTGTCAAAGG

>Chinese colza11

ACATGGGAGTTAGCTTCACTTCCAAATGGACACAAGGCAATTGGTGTGAAGTGGGTGTACAAGGCAAAGAAGAACTCTAAAGGAGAAGTTGAAAGGTACAAGGCAAGATTGGTGGCAAAAGGCTATAGTCAAAGAGCCGGGATCGACTATGATGAGGTATTTGCTCCAGTTGCTCACTTAGAAACGGTTAGACTAATCATTTCATTGGCAGCCCAAAAGAGTTGGAGGATACATCAAATGGATGTAAAATCAGCCTTCTTAAATAGAGACCTTGAAGAAGAAGTCTACATTGAGCAACCAGAAGGCTACATAGTCAAAGGAGAAGAAGACAAAGTCTTAAGGCTGAAAAAGGCGCTTTATGGATTAAAGCAAGCACCAAGAGCATGGAACACTCGGATTGATAAGTACTTCAAGGAGAAAGACTTCATCAAGTGTCCATATGAGCATGCACTTTATATCAAAACTCAAAACAAAGATATATTGATTGCATGCTTATATGTTGATGACTTGATATTCACTGGCAACAATCCGATTATGTTTGAAGATTTCAAGATGGAGATGACAAAAGAGTTCGAGATGACCGACATTGGACTAATGTCATACTACCTTGGCATTGAAGTAAAGCAAGAAGAAAATGGAATCTTCATTACTCAAGAAGGCTATGCAAAAGAGGTGCTTAAGAAGTTCAAGATGGATGACTCAAATCCAGTTTGCACGCCAATGGAATGTGGAGTCAAGTTGTCAAAGG

>Chinese colza12

ACATGGGAGTTAGCTTCACTTCCAAATGGACACAAGGCAATTGGTGTGAAGTGGGTGTACAAGGCAAAGAAGAACTCTAAAGGAGAAGTTGAAAGGTACAAGGCAAGATTGGTGGCAAAAGGCTATAGTCAAAGAGCCGGGATCGACTATGATGAGGTATTTGCTCCAGTTGCTCACTTAGAAACGGTTAGACTAATCATTTCATTGGCAGCCCAAAAGAGTTGGAGGATACATCAAATGGATGTAAAATCAGCCTTCTTAAATAGAGACCTTGAAGAAGAAGTCTACATTGAGCAACCACAAGGCTACATAGTCAAAGGAGAAGAAGACAAAGTCTTAAGGCTGAAGAAGGCGCTTTATGGATTAAAGCAAGCACCAAGAGCGTAGAACACTCGGATTGATAAGTACTTCAAGGAGAAAGGCTTCATCAAGTGTCCATATGAGCATGCACTTTATATCAAAACTCAAAACAATGATATATTGATTGCATGCTTATATGTTGATGACTTGATATTCACTGGCAACAATCCGATTATGTTTGAAGACTTCAAGATGGAGATGACAAAGGAGTTCGAGATGACCGACATTGGATTAATGTCATACTACCTTGGCATTGAAGTAAAGCAAGAAGAAAATGGAATCTTCATTACTCAAGAAGGCTATGCAAAAGAGGTGCTTAAGAAGTTCAAGATGAATGACTCAAATCCAGTTTGCACGCCAATGGAATGTGGAGTCAAGTTGTCAAAGG

>Chinese colza13

ACATGAGAGTTAGCTTCACTTCCAAATGGACACAAGGCAATTGGTGTGAAGTGGGTGTACAAGGCAAAGAAGAACTCTAAAGGAGAAGTTGAAAGGTACAAGGCAAGATTGGTGGCAAAAGGCTATAGTCAAAGAGCCGGGATCGACTATGATGAGGTATTTGCTCCAGTTGCTCGCTTAGAAACGGTTAGACTAATCATTTCATTGGCAGCCCAAAAGAGTTGGAGGATACATCAAATGGATGTAAAATCAGCCTTCTTAAATGGAGACCTTGAAGAAGAAGTCTACATTGAGCAACCACAAAGCTACATAGTCAAAGGAGAAGAAGACAAAGTCTTAAGGCTGAAGAAGGCGCTTTATGGATTAAAGCAAGCACCAAGAGCGTGGAACACTCGGATTGATAAGTACTTCAAGGAGAAAGGCTTCATCAAGTGTCCATATGAGCATGCACTTTATATCAAAACTCAAAACAATGATATATTGATTGCATGCTTATATGTTGATGACTTGATATTCACTGGCAACAATCCGATTATGTTTGAAGATTTCAAGATGGAGATGACAAAAGAGTTCGAGATGACCGACATTGGACTAATGTCATACTACCTTGGCATTGAAGTAAAGCAAGAAGAAAATGGAATCTTCATTACTCAAGAAGGCTATGCAAAAGAGGTGCTTAAGAAATTCAAGATGGATGACTCAAATCCAGTTTGCACGCCAATGGAATGTGGAGTCAAGTTGTCAAAGG

>Chinese colza14

ACATGGGAGTTAGCTTCACTTCCAAATGGACACAAGGCAATTGGTGTGAAGTGGGTGTACAAGGCAAAGAAGAACTCTAAAGGAGAAGTTGAAAGGTACAAGGCAAGATTGGTGGCAAAAGGCTATAGTCAAAGAGCCGGGATCGACTATGATGAGGTATTTGCTCCAGTTGCTCGCTTAGAAACGGTTAGACTAATTATTTCATTGGCAGCCCAAAAAAGTTGGAGGATACATCAAATGGATGTAAAATCAGCCTTCTTAAATGGAGACCTTGAAGAAGAAGTCTACATTGAGCAACCACAAGGCTACATAGTCAAAGGAGAAGAAGACAAAGTCTTAAGGCTGAAGAAGGCGCTTTATGGATTAAAGCAAGCACCAAGAGCATGGAACACTCGGATTGATAAGTACTTCAAGGAGAAAGACTTCATCAAGTGTCCATATGAGCATGCACTTTATATCAAAACTCAAAACAATGATATATTGATTGCATGCTTATATGTTGATGACTTGATATTCACTGGCAACAATCCGATTATGTTTGAAGACTTCAAGATGGAGATGACAAAGGAGTTCGAGATGACCGACATTGGATTAATGTCATACTACCTTGGCATTGAAGTAAAGCAAGAAGAAAATGGAATCTTCATTACTCAAGAAGGCTATGCAAAAGAGGTGCTTAAGAAGTTCAAGATGAATGACTCAAATCCAGTTTGCACGCCAATGGAATGTGGAGTCAAGTTGTCAAAGG

>Chinese colza15

ACATGGGAGTTAGCTTCACTTCCAAATGGACACAAGGCAATTGGTGTGAAGTGGGTGTACAAGGCAAAGAAGAACTCTAAAGGAGAAGTTGAAAGGTACAAGGCAAGATTGGTGGCAAAAGGCTATAGTCAAAGAGCCGGGATCGACTATGATGAGGTATTTGCTCCAGTTGCTCGCTTAGAAACGGTTAGACTAATTATTTCATTGGCAGCCCAAAAAAGTTGGAGGATACATCAAATGGATGTAAAATCAGCCTTCTTAAATGGAGACCTTGAAGAAGAAGTCTACATTGAGCAACCACAAGGCTACATAGTCAAAGGAGAAGAAGACAAAGTCTTAAGGCTGAAGAAGGCGCTTTATGGATTAAAGCAAGCACCAAGAGCATGGAACGCTCGGATTGATAAGTACTTCAAGGAGAAAGGCTTCATCAAGTGTCCATATGAGCATGCACTTTATATCAAAACTCAAAACAATGATATATTGATTGCATGCTTATATGTTGATGACTTGATATTCACTGGCAACAATCCGATTATGTTTGAAGATTTCAAGATGGAGATGACAAAAGAGTTCGAGATGACCGACATTGGACTAATGTCATACTACCTTGGCATTGAAGTAAAGCAAGAAGAAAATGGAATCTTCATTACTCAAGAAGGCTATGCAAAAGAGGTGCTTAAGAAGTTCAAGATGGATGACTCAAATCCAGTTTGCACGCCAATGGAATGTGGAGTCAAGTTGTCAAAGG

>Chinese colza16

ACATGGGAGTTAGCTTCACTTCCAAAAGGACACAAGGCAATTGGTGTGAAGTGGGTGTACAAGGCAAAGAAGAACTCTAAAGGAGAAGTTGAAAGGTACAAGGCAAGATTGGTGGCAAAAGGCTATAGTCAAAGAGCCGGGATCGACTATGATGAGGTATTTGCTCCAGTTGCTCGCTTAGAAACGGTTAGACTAATCATTTCATTGGCAGCCCAAAAGAGTTGGAGGATACATCAAATGGATGTAAAATCAGCCTTCTTAAATGGAGACCTTGAAGAAGAAGTCTACATTGAGCAACCACAAGGCTACATAGTCAAAGGAGAAGAAGACAAAGTCTTAAGGCTGAAGAAGGCGCTTTATGGATTAAAGCAAGCACCAAGAGCGTGGAACACTCGGATTGATAAGTACTTCAAGGAGAAAGGCTTCATCAAGTGTCCATATGAGCATGCACTTTATATCAAAACTCAAAACAATGATATATTGATTGCATGCTTATATGTTGATGACTTGATATTCACTGGCAACAATCCGATTATGTTTGAAGATTTCAAGATGGAGATGACAAAAGAGTTTGAGATGACCGACATTGGACTAATGTCATACTACCTTGGCATTGAAGTAAAGCAAGAAGAAAATGGAATCTTCATTACTCAAGAAGGCTATGCAAAAGAGGTGCTTAAGAAATTCAAGATGGATGACTCAAATCCAGTTTGCACGCCAATGGAATGTGGAGTCAAGTTGTCAAAGG

>Chinese colza18

ACATGGGAGTTAGCTTCACTTCCAAATGGACACAAGGCAATTGGTGTGAAGTGGGTGTACAAGGCAAAGAAGAACTCTAAGGGAGAAGTTGAAAGGTACAAGGCAAGATTGGTGGCAAAAGGCTATAGTCAAAGAGCCGGGATCGACTATGATGAGGTATTTGCTCCAGTTGCTCGCTTAGAAACGGTTAGACTAATCATTCCATTGGCAGCCCAAAAAAGTTGGAGGATACATCAAATGGATGTAAAATCAGCCTTCTTAAATGGAGACCTTGAAGAAGAAGTCTACATTGAGCAACCACAAGGCTACATAGTCAAAGGAGAAGAAGACAAAGTCTTAAGGCTGAAGAAGGCGCTTTATGGATTAAAGCAAGCACCAAGAGCATGGAACACTCGGATTGATAAGTACTTCAAGGAGAAAGACTTCATCAAGTGTCCATATGAGCATGCACTTTATATCAAAACTCAAAACAATGATATATTGATTGCATGCTTATATGTTGATGACTTGATATTCACTGGCAACAATCCGATTATGTTTGAAGACTTCAAGATGGAGATGACAAAGGAGTTCGAGATGACCGACATTGGATTAATGTCATACTACCTTGGCATTGAAGTAAAGCAAGAAGAAAATGGAATCTTCATTACTCAAGAAGGCTATGCAAAAGAGGTGCTTAAGAAGTTCAAGATGAATGACTCAAATCCAGTTTGCACGCCAATGGAATGTGGAGTCAAGTTGTCAAAGG

>Chinese colza19

ACATGGGAGTTAGCTTCACTTCCAAAAGGACACAAGGCAATTGGTGTGAAGTGGGTGTACAAGGCAAAGAAGAACTCTAAAGGAGAAGTTGAAAGGTACAAGGCAAGATTGGTGGCAAAAGGCTATAGTCAAAGAGCCGGGATCGACTATGATGAGGTATTTGCTCCAGTTGCTCGCTTAGAAACGGTTAGACTAATCATTTCATTGGCAGCCCAAAAGAGTTGGAGGATACATCAAATGGATGTAAAATCAGCCTTCTTAAATGGAGACCTTGAAGAAGAAGTCTACATTGAGCAACCACAAGGCTACATAGTCAAAGGAGAAGAAGACAAAGTCTTAAGGCTGAAGAAGGCGCTTTATGGATTAAAGCAAGCACCAAGAGCGTGGAACACTCGGATTGATAAGTACTTCAAGGAGAAAGGCTTCATCAAGTGTCCATATGAGCATGCACTTTATATCAAAACTCAAAACAATGATATATTGATTGCATGCTTATATGTTGATGACTTGATATTCACTGGCAACAATCCGATTATGTTTGAAGATTTCAAGATGGAGATGACAATAGAGTTCGAGATGACCGACATTGGACTAATGTCATACTACCTTGGCATTGAAGTAAAGCAAGAAGAAAATGGAATCTTCATTACTCAAGAAGGCTATGCAAAAGAGGTGCTTAAGAAATTCAAGATGGATGACTCAAATCCAGTTTGCACGCCAATGGAATGTGGAGTCAAGTTGTCAAAGG

>Chinese colza20

ACATGGGAGTTAGCTTCACTTCCAAATGGACACAAGGCAATTGGTGTGAAGTGGGTGTACAAGGCAAAGAAGAACTCTAAAGGAGAAGTTGAAAGGTACAAGGCAAGATTGGTGGCAAAAGGCTATAGTCAAAGAGCCGGGATCGACTATGATGAGGTATTTGCTCCAGTTGCTCGCTTAGAAACGGTTAGACTAATTATTTCATTGGCAGCCCAAAAAAGTTGGAGGATACATCAAATGGATGTAAAATCAGCCTTCTTAAATGGAGACCTTGAAGAAGAAGTCTACATTGAGCAACCACAAGGCTACATAGTCAAAGGAGAAGAAGACAAAGTCTTAAGGCTGAAGAAGGCGCTTTATGGATTAAAGCAAGCACCAAGAGCATGGAACACTCGGATTGATAAGTACTTCAAGGAGAAAGACTTCATCAAGTGTCCATATGAGCATGCACTTTATATCAAAACTCAAAACAATGATATATTGATTGCATGCTTATATGTTGATGACTTGATATTCACTGGCAACAATCCGATTATGTTTGAAGACTTCAAGATGGAGATGACAAAGGAGTTCGAGATGACCGACATTGGATTAATGTCATACTACCTTGGCATTGAAGTAAAGCGAGAAGAAAATGGAATCTTCATTACTCAAGAAGGCTATGCAAAAGAGGTGCTTAAGAAGTTCAAGATGAATGACTCAAATCCAGTTTGCACGCCAATGGAATGTGGAGTCAAGTTGTCAAAGG

>Chinese colza21

ACATGGGAGTTAGTCTCACTTCCAAATGGACACAAGGCAATTGGTGTGAAGTGGGTGTACAAGGCAAAGAAGAACTCTAAAGGAGAAGTTGAAAGGTACAAGGCAAGATTGGTGGCAAAAGGCTATAGTCAAAGAGCCGGGATCGACTATGATGAGGTATTTGCTCCAGTTGCTCGCTTAGAAACGGTTAGACTAATCATTTCATTGGCAGCCCAAAAGAGTTGGAGGATACATCAAATGGATGTAAAATCAGCCTTCTTAAATGGAGACCTTGAAGAAGAAGTCTACATTGAGCAACCACAAGGCTACATAGTCAAAGGAGAAGAAGACAAAGTCTTAAGGCTGAAGAAGGCGCTTTATGGATTAAAGCAAGCACCAAGAGCGTGGAACACTCGGATTGATAAGTACTTCAAGGAGAAAGGCTTCATCAAGTGTCCATATGAGCATGCACTTTATATCAAAACTCAAAACAATGATATATTGATTGCATGTTTATATGTTGATGACTTGATATTCACTGGCAACAATCCGATTATGTTTGAAGATTTCAAGATGGAGATGACAAAAGAGTTCGAGATGACCGACATTGGACTAATGTCATACTACCTTGGCATTGAAGTAAAGCAAGAAGAAAATGGAATCTTCATTACTCAAGAAGGCTATGCAAAAGAGGTGCTTAAGAAGTTCAAGATGGATGACTCAAATCCAGTTTGCACGCCAATGGAATGTGGAGTCAAGTTGTCAAAGG

>Chinese colza22

ACATGGGAGTTAGCTTCACTTCCAAATGGACACAAGGCAATTGGTGTGAAGTGGGTGTACAAGGCAAAGAAGAACTCTAAAGGAGAAGTTGAAAGGTACAAGGCAAGATTGGTGGCAAAAGGCTATAGTCAAAGAGCCGGGATCGACTATGATGAGGTATTTGCTCCAGTTGCTCGCTTAGAAACGGTTAGACTAATCATTTCATTGGCAGCCCAAAAGAGTTGGAGGATACATCAAATGGATGTAAAATCAGCCTTCTTAAATGGAGACCTTGAAGAAGAAGTCTACATTGAGCAACCACAAGGCTACATAGTCAAAGGAGAAGAAGACAAAGTCTTAAGGCTGAAGAAGGCGCTTTATGGATTAAAGCAAGCACCAAGAGCGTGGAACACTCGGATTGATAAGTACTTCAAGGAGAAAGGCTTCATCAAGTGTCCATATGAGCATGCACTTTATATCAAAACTCAAAACAATGATATACTGATTGCATGCTTATATGTTGATGACTTGATATTCACTGGCAACAATCCGATTATGTTTGAAGATTTCAAGATGGAGATGACAAAAGAGTTCGAGATGACCGACATTGGACTAATATCATACTACCTTGGCATTGAAGTAAAGCAAGAAGAAAATGGAATCTTCATTACTCAAGAAGGCTATGCAAAAGAGGTGCTTAAGAAATTCAAGATGGATGACTCAAATCCAGTTTGCACGCCAATGGAATGTGGAGTCAAGTTGTCAAAGG

>turnip1

ATGATACATGGGAGTTAGCTTCACTTCCAAATGGACACAAGGCAATTGGTGTGAAGTGGGTGTACAAGGCAAAGAAGAACTCTAAAGGAGAAGTTGAAAGGTACAAGGCAAGATTGGTGGCAAAAGGCTATAGTCAAAGAGCCGGGATCGACTATGATGAGGTATTTGCTCCAGTTGCTCGCTTAGAAACGGTTAGACTAATTATTTCATTGGCAGCCCAAAAAAGTTGGAGGATACATCAAATGGATGTAAAATCAGCCTTCTTAAATGGAGACCTTGAAGAAGAAGTCTACATTGAGCAACCACAAGGCTACATAGTCAAAGGAGAAGAAGACAAAGTCTTAAGGCTGAAGAAGGCGCTTTATGGATTAAAGCAAGCACCAAGAGCATGGAACACTCGGATTGATAAGTACTTCAAGGAGAAAGACTTCATCAAGTGTCCATATGAGCATGCACTTTATATCAAAACTCAAAACAATGATATATTGATTGCATGCTTATATGTTGATGACTTGATATTCACTGGCAACAATCCGATTATGTTTGAAGACTTCAAGATGGAGATGACAAAGGAGTTCGAGATGACCGACATTGGATTAATGTCATACTACCTTGGCATTGAAGTAAAGCAAGAAGAAAATGGAATCTTCATTACTCAAGAAGGCTATGCAAAAGAGGTGCTTAAGAAGTTCAAGATGAATGACTCAAATCCAGCTTGCACGCCAATGGAATGTGGAGTCAAGTTGTCAAAGG

>turnip2

ATGATACATGGGAGTTAGCTTCACTTCCAAATGGACACAAGGCAATTGGTGTGAAGTGGGTGTACAAGGCAAAGAAGAACTCGAAAGGAGAAGTTGAAAGGTACAAGGCAAGATTGGTGGCAAAAGGCTATAGTCAAAGAGCCGGGATCGACTATGATGAGGTATTTGCTCCAGTTGCTCGCTTAGAAACGGTTAGACTAATTATTTCATTGGCAGCCCAAAAAAGTTGGAGGATACATCAAATGGATGTAAAGTCAGCCTTCTTAAATGGAGACCTTGAAGAAGAAGTCTACATTGAGCAACCACAAGGCTACATAGTCAAAGGAGAAGAAGACAAAGTCTTAAGGCTGAAGAAGGCGCTTTATGGATTAAAGCAAGCACCAAGAGCATGGAACACTCGGATTGATAAGTACTTCAAGGAGAAAGACTTCATCAAGTGTCCATATGAGCATGCACTTTATATCAAAACTCAAAACAATGATGTATTGATTGCATGCTTATATGTTGATGACTTGATATTCACTGGCAACAATCCGATTATGTTTGAAGACTTCAAGATGGAGATGACAAAGGAGTTCGAGATGACCGACATTGGATTAATGTCATACTACCTTGGCATTGAAGTAAAGCAAGAAGAAAATGGAATCTTCATTACTCAAGAAGGCTATGCAAAAGAGGTGCTTAAGAAGTTCAAGATGAATGACTCAAATCCAGCTTGCACGCCAATGGAATGTGGAGTCAAGTTGTCAAAGG

>turnip3

ATGATACATGGGAGTTAGCTTCACTTCCAAATGGACACAAGGCAATTGGTGTGAAGTGGGTGTACAAGGCAAAGAAGAACTCTAAAGGAGAAGTTGAAAGGTACAAGGCAAGATTGGTGGCAAAAGGCTATAGTCAAAGAGCCGGGATCGACTATGATGAGGTATTTGCTCCAGTTGCTCGCTTAGAAACGGTTAGACTAATTATTTCATTGGCAGCCCAAAAAAGTTGGAGGATACATCAAATGGATGTAAAATCAGCCTTCTTAAATGGAGACCTTGAAGAAGAAGTCTACATTGAGCAACCACAAGGCTACATAGTCAAAGGAGAAGAAGACAAAGTCTTAAGGCTGAAGAAGGCGCTTTATGGATTAAAGCAAGCACCAAGAGCATGGAACACTCGGATTGATAAGTACTTCAAGGAGAAAGACTTCATCAAGTGTCCATATGAGCATGCACTTTATATCAAAACTCAAAACAATGATATATTGATTGCATGCTTATATGTTGATGACTTGATATTCACTGGCAACAATCCGATTATGTTTGAAGACTTCAAGATGGAGATGACAAAGGAGTTCGAGATGACCGACATTGGATTAATGTCATACTACCTTGGCATTGAAGTAAAGCAAGAAGAAAATGGAATCTTCATTACTCAAGAAGGCTATGCAAAAGAGGTGCTTAAGAAGTTCAAGATGAATGACTCAAATCCAGTTTGCACGCCAATGGAATGTGGAGTCAAGTTGTCAAAGG

>turnip4

ATGATACATGGGAGTTAGCTTCACTTCCAAATGGACACAAGGCAATTGGTGTGAAGTGGGTGTACAAGGCAAAGAAGAACTCTAAAGGAGAAGTTGAAAGGTACAAGGCAAGATTGGTGGCAAAAGGCTATAGTCAAAGAGCCGGGATCGACTATGATGAGGTATTTGCTCCAGTTGCTCGCTTAGAAACGGTTAGACTAATTATTTCATTGGCAGCCCAAAAAAGTTGGAGGATACATCAAATGGATGTAAAATCAGCCTTCTTAAATGGAGACCTTGAAGAAGAAGTCTACATTGAGCAACCACAAGGCTACATAGTCAAAGGAGAAGAAGACAAAGTCTTAAGGCTGAAGAAGGCGCTTTATGGATTAAAGCAAGCACCAAGAGCATGGAACACTCGGATTGATAAGTACTTCAAGGAGAAAGACTTCATCAAGTGTCCATATGAGCATGCACTTTATATCAAAACTCAAAACAATGATATATTGATTGCATGCTTATATGTTGATGACTTGATATTCACTGGCAACAATCCGATTATGTTTGAAGACTTCAAGATGGAGATGACAAAGGAGTTCGAGATGACCGACATCGGATTAATGTCATACTACCTTGGCATTGAAGTAAAGCAAGAAGAAAATGGAATCTTCATTACTCAAGAAGGCTATGCAAAAGAGGTGCTTAAGAAGTTCAAGATGAATGACTCAAATCCAGCTTGCACGCCAATGGAATGTGGAGTCAAGTTGTCAAAGG

>turnip5

ACGATACATGGGAGTTAGCTTCACTTCCAAATGGACACAAGGCAATTGGTGTGAAGTGGGTGTACAAGGCAAAGAAGAACTCTAAAGGAGAAGTTAAAAGGTACAAGGCAAGATTGGTGGCAAAAGGCTATAGTCAAAGAGCCGGGATCGACTATGATGAGGTATTTGCTCCAGTTGCTCGCTTAGAAACGGTTAGACTAATCATTTCATTGGCAGCCCAAAAGAGTTGGAGGATACATCAAATGGATGTAAAATCAGCCTTCTTAAATGGAGACCTTGAAGAAGAAGTCTACATTGAGCAACCACAAGGCTACATAGTCAAAGGAGAAGAAGACAAAGTCTTAAGGCTGAAGAAGGCGCTTTATGGATTAAAGCAAGCACCAAGAGCGTGGAACACTCGGATTGATAAGTACTTCAAGGAGAAAGGCTTCATCAAGTGTCCATATGAGCATGCACTTTATATCAAAACTCAAAACAATGATATATTGATTGCATGCTTATATGTTGATGACTTGATATTCACTGGCAACAATCCGATTATGTTTGAAGATTTCAAGATGGAGATGACAAAAGAGTTCGAGATGACCGACATTGGACTAATGTCATACTACCTTGGCATTGAAGTAAAGCAAGAAGAAAATGGAATCTTCATTACTCAAGAAGGCTATGCAAAAGAGGTGCTTAAGAAATTCAAGATGGATGACTCAAATCCAGTTTGCACGCCAATGGAATGTGGAGTCAAGTTGTCAAAGG

>turnip6

ATGATACATGGGAGTTAGCTTCGCTTCCAAATGGACACAAAGAAATTGGTGTGAAGTGGGTGTACAAGGCAAAGAAGAACTCTAAAGGAGAAGTTGAAAGGTACAAGGTAAAATTGGTGGCAAAAGGCTATAGTCAAAGAGCCGGAATCGACAACGATGAGGTATTTGCTCCAATTGCTTGCTTAGAAATGATTAGACTAATCATTTCATTGGCAGCCCAAAAGAGTTGGAGGATACATCAAATGGATGTAAAATCAGCCTTCTTAAATAAAGACCTTGAGGAAGAAGTCTACATTGAGCAACCACAAGGCTACATAGTCAAAGGAGAAGAAGACAACGTCTTAAGGCTGATGAAAGCGCTTTATGGATTAAAACAAGCACCAAGAGCATGGAACATTCGGATTGATAAATAATTCAAGGAGAAAGGCTTCATCAAGTGTCCATATGAGCATGCACTTTATATCAAAACTCAAAACAATGATATATTGATTGCATGCTTATATATTGATGACTTGATATTCACTGGCAAAAATCCGATTATGTTTGAAGATTTCAAGATGGAGATGACAGAGGAGTTCGAGATGACCGATATTGGATTGATGTCATACTACCTTGGCATTGAAGTAAAGCAAGAAGAAAATGGAATCTTTATTGCTCAATAAGGCTTTGCAAAAGAGGTGCTTAAGAAGTTCAAGATGGATGACTCAAATCCAGTTTGCACGCCAATGGAATGTGGAGTCAAGTTGGCAAAGG

>turnip7

ATGATACATGGGAGTTAGCTTCGCTTCCAAATGGACACAAAGAAATTGGTGTGAAGTGGGTGTACAAGGCAAAGAAGAACTCTAAAGGAGAAGTTGAAAGGTACAAGGTAAAATTGGTGGCAAAAGGCTATAGTCAAAGAGCCGGAATCGACAACGATGAGGTATTTGCTCCAATTGCTTGCTTAGAAATGATTAGACTAATCATTTCATTGGCAGCCCAAAAGAGTTGGAGGATACATCAAATGGATGTAAAATCAGCCTTCTTAAATAAAGACCTTGAGGAAGAAGTCTACATTGAGCAACCACAAGGCTACATAGTCAAAGGAGAAGAAGACAACGTCTTAAGGCTGATGAAAGCGCTTTATGGATTAAAACAAGCACCAAGAGCATGGAACATTCGGATTGATAAATAATTCAAGGAGAAAGGCTTCATCAAGTGTCCATATGAGCATGCACTTTATATCAAAACTCAAAACAATGATATATTGATTGCATGCTTATATATTGATGACTTGATATTCACTGGCAAAAATCCGATTATGTTTGAAGATTTCAAGATGGAGATGACAGAGGAGTTCGAGATGACCGATATTGGATTGATGTCATACTACCTTGGCATTGAAGTAAAGCAAGAAGAAAATGGAATCTTTATTGCTCAATAAGGCTTTGCAAAAGAGGTGCTTAAGAAGTTCAAGATGGATGACTCAAATCCAGTTTGCACGCCAATGGAATGTGGAGTCAAGTTGGCAAAGG

>turnip8

ATGATACATGGGAGTTAGCTTCACTTCCAAATGGACACAAGGCAATTGGTGTGAAGTGGGTGTACAAGGCAAAGAAGAACTCTAAAGGAGAAGTTGAAAGGTACAAGGCAAGATTGGTGGCAAAAGGCTATAGTCAAAGAGCCGGGATCGACTATGATGAGGTATTTGCTCCAGTTGCTCGCTTAGAAACGGTTAGACTAATTATTTCATTGGCAGCCCAAAAAAGTTGGAGGATACATCAAATGGATGTAAAATCAGCCTTCTTAAATGGAGACCTTGAAGAAGAAGTCTACATTGAGCAACCACAAGGCTACATAGTCAAAGGAGAAGAAGACAAAGTCTTAAGGCTGAAGAAGGCGCTTTATGGATTAAAGCAAGCACCAAGAGCATGGAACACTCGGATTGATAAGTACTTCAAGGAGAAAGACTTCATCAAGTGTCCATATGAGCATGCACTTTATATCAAAACTCAAAACAATGATATATTGATTGCATGCTTATATGTTGATGACTTGATATTCACTGGCAACAATCCGATTATGTTTGAAGACTTCAAGATGGAGATGACAAAGGAGTTCGAGATGACCGACATTGGATTAATGTCATACTACCTTGGCATTGAAGTAAAGCAAGAAGAAAATGGAATCTTCATTACTCAAGAAGGCTATGCAAAAGAGGTGCTTAAGAAGTTCAAGATGAATGACTCAAATCCAGTTTGCACGCCAATGGAATGTGGAGTCAAGTTGTCAAAGG

>turnip10

ATGATACATGGGAGTTAGCTTCACTTCCAAATGGACACAAGGCAATTGGTGTGAAGTGGGTGTACAAGGCAAAGAAGAACTCTAAAGGAGAAGTTGAAAGGTACAAGGCAAGATTGGTGGCAAAAGGCTATAGTCAAAGAGCCGGGATCGACTATGATGAGGTATTTGCTCCAGTTGCTCGCTTAGAAACGGTTAGACTAATTATTTCATTGGCAGCCCAAAAAAGTTGGAGGATACATCAAATGGATGTAAAATCAGCCTTCTTAAATGGAGACCTTGAAGAAGAAGTCTACATTGAGCAACCACAAGGCTACATAGTCAAAGGAGAAGAAGACAAAGTCTTAAGGCTGAAGAAGGCGCTTTATGGATTAAAGCAAGCACCAAGAGCATGGAACACTCGGATTGATAAGTACTTCAAGGAGAAAGACTTCATCAAGTGTCCATATGAGCATGCACTTTATATCAAAACTCAAAACAATGATATATTGATTACATGCTTATATGTTGATGACTTGATATTCACTGGCAACAATCCGATTATGTTTGAAGACTTCAAGATGGAGATGACAAAGGAGTTCGAGATGACCGACATTGGATTAATGTCATACTACCTTGGCATTGAAGTAAAGCAAGAAGAAAATGGAATCTTCATTACTCAAGAAGGCTATGCAAAAGAGGTGCTTAAGAAGTTCAAGATGAATGACTCAAATCCAGTTTGCACGCCAATGGAATGTGGAGTCAAGTTGTCAAAGG

>turnip11

ATGATACATGGGAGTTAGTCTCACTTCCAAATGGACACAAGGCAATTGGTGTGAAGTGGGTGTACAAGGCAAAGAAGAACTCTAAAGGAGAAGTTGAAAGGTACAAGGCAAGATTGGTGGCAAAAGGCTATAGTCAAAGAGCCGGGATCGACTATGATGAGGTATTTGCTCCAGTTGCTCGCTTAGAAACGGTTAGACTAATCATTTCATTGGCAGCCCAAAAGAGTTGGAGGATACATCAAATGGATGTAAAATCAGCCTTCTTAAATGGAGACCTTGAAGAA---GTCTACATTGAGCAACCACAAGGCTACATAGTCAAAGGAGAGGAAGACAAAGTCTTAAGGCTGAAGAAGGCGCTTTATGGATTAAAGCAAGCACCAAGAGCGTGGAACACTCGGATTGATAAGTACTTCAAGGAGAAAGACTTCATCAAGTGTCCATATGAGCATGCACTTTATATCAAAACTCAAAACAATGATATATTGATTGCATGCTTATATGTTGATGACTTGATATTCACTGGCAACAATCCGATTATGTTTGAAGACTTCAAGATGGAGATGACAAAGGAGTTCGAGATGACCGACATTGGATTAATGTCATACTACCTTGGCATTGAAGTAAAGCAAGAAGAAAATGGAATCTTCATTACTCAAGAAGGCTATGCAAAAGAGGTGCTTAAGAAGTTCAAGATGAATGACTCAAATCCAGTTTGCACGCCAATGGAATGTGGAGTCAAGTTGTCAAAGG

>turnip12

ATGATACATGGGAGTTAGCTTCACTTCCAAATGGACACAAGGCAATTGGTGTGAAGTGGGTGTACAAGGCAAAGAAGAACTCTAAAGGAGAAGTTGAAAGGTACAAGGCAAGATTGGTGGCAAAAGGCTATAGTCAAAGAGCCGGGATCGACTATGATGAGGTATTTGCTCCAGTTGCTCGCTTAGAAACGGTTAGACTAATCATTTCATTGGCAGCCCAAAAGAGTTGGAGGATACATCAAATGGATGTAAAATCAGCCTTCTTAAATGGAGACCTTGAAGAAGAAGTCTACATTGAGCAACCACAAAGCTACATAGTCAAAGGAGAAGAAGACAAAGTCTTAAGGCTGAAGAAGGCGCTTTATGGATTAAAGCAAGCACCAAGAGCGTGGAACACTCGGATTGATAAGTACTTCAAGGAGAAAGGCTTCATCAAGTGTCCATATGAGCATGCACTTTATATCAAAACTCAAAACAATGATATATTGATTGCATGCTTATATGTTGATGACTTGATATTCACTGGCAACAATCCGATTATGTTTGAAGATTTCAAGATGGAGATGACAAAAGAGTTCGAGATGACCGACATTGGACTAATGTCATACTACCTTGGCATTGAAGTAAAGCAAGAAGAAAATGGAATCTTCATTACTCAAGAAGGCTATGCAAAAGAGGTGCTTAAGAAATTCAAGATGGATGACTCAAATCCAGTTTGCACGCCAATGGAATGTGGAGTCAAGTTGTCAAAGG

>turnip13

ATGATACATGGGAGTTAGCTTCACTTCCAAATGGACACAAGGCAATTGGTGTGAAGTGGGTGTACAAGGCAAAGAAGAACTCTAAAGGAGAAGTTGAAAGGTACAAGGCAAGATTGGTGGCAAAAGGCTATAGTCAAAGAGCCGGGATCGACTATGATGAGGTATTTGCTCCAGTTGCTCGCTTAGAAACGGTTAGACTAATTATTTCATTGGCAGCCCAAAAAAGTTGGAGGATACATCAAATGGATGTAAAATCAGCCTTCTTAAATGGAGACCTTGAAGAAGAAGTCTACATTGAGCAACCACAAGGCTACATAGTCAAAGGAGAAGAAGACAAAGTCTTAAGGCTGAAGAAGGCGCTTTATGGATTAAAGCAAGCACCAAGAGCATGGAACACTCGGATTGATAAGTACTTCAAGGAGAAAGACTTCATCAAGTGTCCATATGAGCATGCACTTTATATCAAAACTCAAAACAATGATATATTGATTGCATGCTTATATGTTGATGACTTGATATTCACTGGCAACAATCCGATTATGTTTGAAGACTTCAAGATGGAGATGACAAAGGAGTTCGAGATGACCGACATTGGATTAATGTCATACTACCTTGGCATTGAAGTAAAGCAAGAAGAAAATGGAATCTTCATTACTCAAGAAGGCTATGCAAAAGAGGTGCTTAAGAAGTTCAAGATGAATGACTCAAATCCAGCTTGCACGCCAATGGAATGTGGAGTCAAGTTGTCAAAGG

>turnip14

ATGATACATGGGAGTTAGCTTCACTTCCAAATGGACACAAGGCAATTGGTGTGAAGTGGGTGTACAAGGCAAAGAAGAACTCTAAAGGAGAAGTTGAAAGGTACAAGGCAAGATTGGTGGCAAAAGGCTATAGTCAAAGAGCCGGGATCGACTATGATGAGGTATTTGCTCCAGTTGCTCACTTAGAAACGGTTAGACTAATCATTTCATTGGCAGCCCAAAAGAGTTGGAGGATACATCAAATGGATGTAAAATCAGCCCTCTTAAATAGAGACCTTGAAGAAGAAGTCTACATTGAGCAACCACAAGGCTACATAGTCAAAGGAGAAGAAGACAAAGTCTTAAGGCTGAAGAAGGCGCTTTATGGATTAAAGCAAGCACCAAGAGCGTGGAACACTCGGATTGATAAGTACTTCAAGGAGAAAGGCTTCATCAAGTGTCCATATGAGCATGCACTTTATATCAAAACTCAAAACAATGATATATTGATTGCATGCTTATATGTTGATGACTTGATATTCACTGGCAACAATCCGATTATGTTTGAAGATTTCAAGATGGAGATGACAAAAGAGTTCGAGATGACCGACATTGGACTAATGTCATACTACCTTGGCATTGAAGTAAAGCAAGAAGAAAATGGAATCTTCATTACTCAAGAAGGCTATGCAAAAGAGGTGCTTAAGAAATTCAAGATGGATGACTCAAATCCAGTTTGCACGCCAATGGAATGTGGAGTCAAGTTGTCAAAGG

>turnip15

ATGATACATGGGAGTTAGCTTCACTTCCAAATGGACACAAGGCAATTGGTGTGAAGTGGGTGTACAAGGCAAAGAAGAACTCTAAAGGAGAAGTTGAAAGGTACAAGGCAAGATTGGTGGCAAAAGGCTATAGTCAAAGAGCCGGGATCGACTATGATGAGGTATTTGCTCCAGTTGCTCGCTTAGAAACGGTTAGACTAATCATTTCATTGGCAGCCCAAAAGAGTTGGAGGATACATCAAATGGATGTAAAATCAGCCTTCTTAAATGGAGACCTTGAAGAAGAAGTCTACATTGAGCAACCACAAGGCTACATAGTCAAAGGAGAAGAAGACAAAGTCTTAAGGCTGAAGAAGGCGCTTTATGGATTAAAGCAAGCACCAAGAGCGTGGAACACTCGGATTGATAAGTACTTCAAGGAGAAAGGCTTCATCAAGTGTCCATATGAGCATGCACTTTATATCAAAACTCAAAACAATGATATATTGATTGCATGCTTATATGTTGATGACCTGATATTCACTGGCAACAATCCGATTATGTTTGAAGATTTCAAGATGGAGATGACAAAAGAGTTCGAGATGACCGACATTGGACTAATGTCATACTATCTTGGCATTGAAGTAAAGCAAGAAGAAAATGGAATCTTCATTACTCAAGAAGGCTATGCAAAAGAGGTGCTTAAGAAATTCAAGATGGATGACTCAAATCCAGTTTGCACGCCAATGGAATGTGGAGTCAAGTTGTCAAAGG

>turnip16

ATGATACATGGGAGTTAGTCTCACTTCCAAATGGACACAAGGCAATTGGTGTGAAGTGGGTGTACAAGGCAAAGAAGAACTCTAAAGGAGAAGTTGAAAGGTACAAGGCAAGATTGGTGGCAAAAGGCTATAGTCAAAGAGCCGGGATCGACTATGATGAGGTATTTGCTCCAGTTGCTCGCTTAGAAACGGTTAGACTAATCATTTCATTGGCAGCCCAAAAGAGTTGGAGGATACATCAAATGGATGTAAAATCAGCCTTCTTAAATGGAGACCCTGAAGAAGAAGTCTACATTGAGCAACCACAAGGCTACATAGTCAAAGGAGAAGAAGACAAAGTCTTAAGGCTGAAGAAGGCGCTTTATGGATTAAAGCAAGCACCAAGAGCGTGGAACACTCGGATTGATAAGTACTTCAAGGAGAAAGGCTTCATCAAGTGTCCATATGAGCATGCACTTTATATCAAAACTCAAAACAATGATATATTGATTGCATGTTTATATGTTGATGACTTGATATTCACTGGCAACAATCCGATTATGTTTGAAGATTTCAAGATGGAGATGACAAAAGAGTTCGAGATGACCGACATTGGACTAATGTCATACTACCTTGGCATTGAAGTAAAGCAAGAAGAAAATGGAATCTTCATTACTCAAGAAGGCTATGCAAAAGAGGTGCTTAAGAAGTTCAAGATGGATGACTCAAATCCAGTTTGCACGCCAATGGAATGTGGAGTCAAGTTGTCAAAGG

>turnip17

ACGATACATGGGAGTTAGCTTCACTTCCAAATGGACACAAGGCAATTGGTGTGAAGTGGGTGTACAAGGCAAAGAAGAACTCTAAAGGAGAAGTTAAAAGGTACAAGGCAAGATTGGTGGCAAAAGGCTATAGTCAAAGAGCCGGGATCGACTATGATGAGGTATTTGCTCCAGTTGCTCGCTTAGAAACGGTTAGACTAATCATTTCATTGGCAGCCCAAAAGAGTTGGAGGATACATCAAATGGATGTAAAATCAGCCTTCTTAAATGGAGACCTTGAAGAAGAAGTCTACATTGAGCAACCACAAGGCTACATAGTCAAAGGAGAAGAAGACAAAGTCTTAAGGCTGAAGAAGGCGCTTTATGGATTAAAGCAAGCACCAAGAGCGTGGAACACTCGGATTGATAAGTACTTCAAGGAGAAAGGCTTCATCAAGTGTCCATATGAGCATGCACTTTATATCAAAACTCAAAACAATGATATATTGATTGCATGCTTATATGTTGATGACTTGATATTCACTGGCAACAATCCGATTATGTTTGAAGATTTCAAGATGGAGATGACAAAAGAGTTCGAGATGACCGACATTGGACTAATGTCATACTACCTTGGCATTGAAGTAAAGCAAGAAGAAAATGGAATCTTCATTACTCAAGAAGGCTATGCAAAAGAGGTGCTTAAGAAATTCAAGATGGATGACTCAAATCCAGTTTGCACGCCAATGGAATGTGGAGTCAAGTTGTCAAAGG

>turnip18

ATGATACATGGGAGTTAGCTTCACTTCCAAATGGACACAAGGCAATTGGTGTGAAGTGGGTGTACAAGGCAAAGAAGAACTCTAAAGGAGAAGTTGAAAGGTACAAGGCAAGATTGGTGGCAAAAGGCTATAGTCAAAGAGCCGGGATCGACTATGATGAGGTATTTGCTCCAGTTGCTCGCTTAGAAACGGTTAGACTAATCATTTCATTGGCAGCCCAAAAGAGTTGGAGGATACATCAAATGGATGTAAAATCAGCCTTCTTAAATGGAGACCTTGAAGAAGAAGTCTACATTGAGCAACCACAAAGCTGCATAGTCAAAGGAGAAGAAGACAAAGTCTTAAGGCTGAAGAAGGCGCTTTATGGATTAAAGCAAGCACCAAGAGCGTGGAACACTCGGATTGATAAGTACTTCAAGGAGAAAGGCTTCATCAAGTGTCCATATGAGCATGCACTTTATATCAAAACTCAAAACAATGATATATTGATTGCATGCTTATATGTTGATGACTTGATATTCACTGGCAACAATCCGATTATGTTTGAAGATTTCAAGATGGAGATGACAAAAGAGTTCGAGATGACCGACATTGGACTAATGTCATACTACCTTGGCATTGAAGTAAAGCAAGAAGAAAATGGAATCTTCATTACTCAAGAAGGCTATGCAAAAGAGGTGCTTAAGAAATTCAAGATGGATGACTCAAATCCAGTTTGCACGCCAATGGAATGTGGAGTCAAGTTGTCAAAGG

>turnip19

ATGATACATGGGAGTTAGCTTCACTTCCAAATGGACACAAAGAAATTGGTGTGAAGTGGGTGTACAAGGCAAAGAAGAACTCTAAAGGAGAAGTTGAAAGGTACAAGGTAAAATTGGTGGCAAAAGGCTATAGTCAAAGAGCCGGAATCGACAACGATGAGGTATTTGCTCCAATTGCTTGCTTAGAAATGATTAGACTAATCATTTCATTGGCAGCCCAAAAGAGTTGGAGGATACATCAAATGGATGCAAAATCAGCCTTCTTAAATAAAGACCTTGAGGAAGAAGTCTACATTGAGCAACCACAAGGCTACATAGTCAAAGGAGAAGAAGACAACGTCTTAAGGCTGATGAAAGCGCTTTATGGATTAAAACAAGCACCAAGAGCATGGAACATTCGGATTGATAAATAATTCAAGGAGAAAGGCTTCATCAAGTGTCCATATGAGCATGCACTTTATATCAAAACTCAAAACAATGATATATTGATTGCATGCTTATATATTGATGACTTGATATTCACTGGCAAAAATCCGATTATGTTTGAAGATTTCAAGATGGAGATGACAGAGGAGTTCGAGATGACCGATATTGGATTGATGTCATACTACCTTGGCATTGAAGTAAAGCAAGAAGAAAATGGAATCTTTATTGCTCAATAAGGCTTTGCAAAAGAGGTGCTTAAGAAGTTCAAGATGGATGACTCAAATCCAGTTTGCACGCCAATGGAATGTGGAGTCAAGTTGGCAAGGG

>turnip21

ATGATACATGGGAGTTAGCTTCACTTCCAAATGGACACAAGGCAATTGGTGTGAAGTGGGTGTACAAGGCAAAGAAGAACTCTAAAGGAGAAGTTGAAAGGTACAAGGCAAGATTGGTGGCAAAAGGCTATAGTCAAAGAGCCGGGATCGACTATGATGAGGTATTTGCTCCAGTTGCTCGCTTAGAAACGGTTAGACTAATTATTTCATTGGCAGCCCAAAAAAGTTGGAGGATACATCAAATGGATGTAAAATCAGCCTTCTTAAATGGAGACCTTGAAGAAGAAGTCTACATTGAGCAACCACAAGGCTACATAGTCAAAGGAGAAGAAGACAAAGTCTTAAGGCTGAAGAAGGCGCTTTATGGATTAAAGCAAGCACCAAGAGCATAGAACACTCGGATTGATAAGTACTTCAAGGAGAAAGACTTCATCAAGTGTCCATATGAGCATGCACTTTATATCAAAACTCAAAACAATGATATATTGATTGCATGCTTATATGTTGATGACTTGATATTCACTGGCAACAATCCGATTATGTTTGAAGACTTCAAGATGGAGATGACAAAGGAGTTCGAGATGACCGACATTGGATTAATGTCATACTACCTTGGCATTGAAGTAAAGCAAGAAGAAAATGGAATCTTCATTACTCAAGAAGGCTATGCAAAAGAGGTGCTTAAGAAGTTCAAGATGAATGACTCAAATCCAGTTTGCACGCCAATGGAATGTGGAGTCAAGTTGTCAAAGG

>mustard greens1

ATGACACATGGGAGTTAGCTTCACTTCCACATGGGCATAAAGCAATTGGTGTTAAGTGGGTGTACAAAGCAAAGAAGAATTCTAAAGGAGAAGTTGAAAGGTACAAGGCAAGATTGGTGGCGAAAGGCTATAGTCAAAGAGCCGGAATCGACTATGATGAGGTATTTGCCCCTGTCGCTCGTTTAGAAACTGTTAGACTAATCATTTCATTGGCAGCCCAAAAGAGTTGGAAGATACATCAAATGGATGTCAAATCAGCCTTCTTAAATGGAGATCTTGAGGAAGAAGTTTACATTGAGCAACCACAAGGCTACAAAGTCAAAGGAGAAGAAGACAAAGTCTTAAGGCTTAAGAAGGCGCTATATGGACTAAAGCAAGCACCAAGAGCATGGAACACTCGGATTGATAAGTACTTCAAGGAGAAAAGCTTCATCAAGTGTCCATATGAGCATGCACTTTATATCAAAACTCAAAACAATGATATATTGATTGCATGCTTGTATGTGGATGACTTGATATTCACCGGCAACAATCCGAGTATGTTTGAAGTCTTCAAGAAGGAGATGACAAAGGAGTTCGAGATGACTGATATTGGATTGATGTCATACTACCTTGGCATTGAAGTAAAGCAAGAAGAAAATAGAATCTTAATTACTCAAGAAGGCTATGCTAAAGAGGTGCTTAAGAAGTTCAAGATGGATGACTCAAATCCAGTATGCACGCCGGTGGAATGTGGAGTCAAGTTGTCAAAGG

>mustard greens4

ATGATACATGGGAGTTAGCTTCACTTCCACATGGGCATAAAGCAATTGGTGTTAAGTGGGTGTACAAAGCAAAGAAGAATTCTAAAGGAGAAGTTGAAAGGTACAAGGCAAGATTGGTGGCGAAAGGCTATAGTCAAAGAGCCGGAATCGACTATGATGAGGTATTTGCCCCTGTCGCTCGTTTAGAAACTGTTAGACTAATCATTTCATTGGCAGCCCAAAAGAGTTGGAAGATACATCAAATGGATGTCAAATCAGCCTTCTTAAATGGAGATCTTGAGGAAGAAGTTTACGTTGAGCAACCACAAGGCTACAAAGTCAAAGGAGAAGAAGACAAAGTCTTAAGGCTTAAGAAGGCGCTATATGGATTAAAGCAAGCACCAAGAGCATGGAACACTCGGATTGATAAGTACTTCAAGGAGAAAAGCTTCATCAAGTGTCCATATGAGCATGCACTTTATATCAAAACTCAAAACAATGATATATTGATTGCATGCTTGTATGTGGATGACTTGATATTCACCGGCAACAATCCGAGTATGTTTGAAGCCTTCAAGAAGGAGATGACAAAGGAGTTCGAGATGACTGATATTGGATTGATGTCATACTACCTTGGCATTGAAGTAAAGCAAGAAGAAAATGGAATCTTCATTACTCAAGAAGGCTATGCAAAAGAGGTGCTTAAGAAGTTCAAGATGAATGACTCAAATCCAGTTTGCACGCCAATGGAATGTGGAGTCAAGTTGTCAAAGG

>mustard greens5

ATGATACATGGGAGTTAGCTTCACTTCCAAATGGACACAAGGCAATTGGTGTGAAGTGGGTGTACAAGGCAAAGAAGAACTCTAAAGGAGAAGTTGAAAGGTACAAGGCAAGATTGGTGGCAAAAGGCTATAGTCAAAGAGCCGGGATCGACTATGATGAGGTATTTGCTCCAGTTGCTCGCTTAGAAACGGTTAGACTAATTATTTCATTGGCAGCCCAAAAAAGTTGGAGGATACATCAAATGGATGTAAAATCAGCCTTCTTAAATGGAGACCTTGAAGAAGAAGTCTACATTGAGCAACCACAAGGCTACATAGTCAAAGGAGAAGAAGACAAAGTCTTAAGGCTGAAGAAGGCGCTTTATGGATTAAAGCAAGCACCAAGAGCATGGAACACTCGGATTGATAAGTACTTCAAGGAGAAAGACTTCATCAAGTGTCCATATGAGCATGCACTTTATATCAAAACTCAAAACAATGATATATTGATTGCATGCTTATATGTTGATGACTTGATATTCACTGGCAACAATCCGATTATGTTTGAAGATTTCAAGATGGAGATGACAAAAGAGTTCGAGATGACCGACATTGGACTAATGTCATACTACCTTGGCATTGAAGTAAAGCAAGAAGAAAATGGAATCTTCATTACTCAAGAAGGCTATGCAAAAGAGGTGCTTAAGAAGTTCAAGATGGATGACTCAAATCCAGTTTGCACGCCAATGGAATGTGGAGTCAAGTTGTCAAAGG

>mustard greens6

ATGACACATGGGAGTTAGCTTCACTTCCACATGGGCATAAAGCAATTGGTGTTAAGTGGGTGTACAAAGCAAAGAAGAATTCTAAAGGAGAAGTTGAAAGGTACAAGGCAAGATTGGTGGCGAAAGGCTATAGTCAAAGAGCCGGAATCGACTATGATGAGGTATTTGCCCCTGTCGCTCGTTTAGAAACTGTTAGACTAATCATTTCATTGGCAGCCCAAAAGAGTTGGAAGATACATCAAATGGATGTCAAATCAGCCTTCTTAAATGGAGATCTTGAGGAAGAAGTTTACATTGAGCAACCACAAGGCTACAAAGTCAAAGGAGAAGAAGACAAAGTCTTAAGGCTTAAGAAGGCGCTATATGGACTAAAGCAAGCACCAAGAGCATGGAACACTCGGATTGATAAGTACTTCAAGGAGAAAAGCTTCATCAAGTGTCCATATGAGCATGCACTTTATATCAAAACTCAAAACAATGATATATTGATTGCATGCTTGTATGTGGATGACTTGATATTCACCGGCAACAATCCGAGTATGTTTGAAGTCTTCAAGAAGGAGATGACAAAGGAGTTCGAGATGACTGATATTGGATTGATGTCATACTACCTTGGCATTGAAGTAAAGCAAGAAGAAAATAGAATCTTAATTACTCAAGAAGGCTATGCTAAAGAGGTGCTTAAGAAGTTCAAGATGGATGACTCAAATCCAGTATGCACGCCAATGGAATGTGGAGTCAAGTTGTCAAAGG

>mustard greens7

ATGATACATGGGAGTTAGCTTCGCTTCCAAATGGACACAAAGCAATTGGTGTGAAGTGGGTGTACAAGGCAAAGAAGAACTCTAAAGGAGAAGTTGAAAGGTACAAGGTAAGATTGGTGGCAAAAGGCTATAGTCAAAGAGCCGGGATCGACAACGATGAGGTATTTGCTCCAATTGCTTGCTTAGAAATGATTATACTAATCATTTCATTGGCAGCCCAAAAGAGTTGGAGGATACATCAAATAGATGTAAAATCAGCCTTCTTAAATAAAGACCTTGAGAAAGAAGTCTACATTGAGCAACCACAAGGCTACATAGTCAAAGGAGAAGAAGACAACGTCTTAAGGCTGATGAAAGCGCTTTATGGATTAAAACAAGCACCAAGAGCATGGAACACTCGGATTGATAAATACTTCAAGGAGAAAGGCTTCATCAAGTGTCCATATGAGCATGCACTTTATATCAAAACTCAAAACAATGATATATTGATTGCATGCTTATATACTGATGACTTGATATTCACTGGCAACAATCCGATTATGTTTGAAGATTTCAAGATGGAGATGACAGAGGAGTTCGAGATGACCGATATTGGATTGATGTCATACTACCTTGGCATTGAAGTAAAGCAAGAAGAAAATGGAATCTTTATTGCTCAAGAAGGCTTTGCAAAAGAGGTGCTTAAGAAGTTCAAGATGGATGACTCAAATCCAGTTTGCACGCCAATGGAATGTGGAGTCAAGTTGGCAAAGG

>mustard greens8

ATGATACATGGGAGTTAGCTTCACTTCCACATGGGCATAAAGCAATTGGTGTTAAGTGGGTGTACAAAGCAAAGAAGAATTCTAAAGGAGAAGTTGAAAGGTACAAGGCAAGATTGGTGGCGAAAGGCTATAGTCAAAGAGCCGGAATCGACTATGATGAGGTATTTGCCCCTGTCGCTCGTTTAGAAACTGTTAGACTAATCATTTCATTGGCAGCCCAAAAGAGTTGGAAGATACATCAAATGGATGTCAAATCAGCCTTCTTAAATGGAGATCTTGAGGAAGACGTTTACGTTGAGCAACCACAAAGCTACAAAGTCAAAGGAGAAGAAGACAAAGTCTTAAGGCTTAAGAAGGCGCTATATGGATTAAAGCAAGCACCAAGAGCATGGAACACTCGGATTGATAAGTACCTCAAGGAGAAAAGCTTCATCAAGTGTCCATATGAGCATGCACTTTATATCAAAACTCAAAACAATGATATATTGATTGCATGCTTGTATGTGGATGACTTGATATTCACCGGCAACAATCCGAGTATGTTTGAAGCCTTCAAGAAGGAGATGACAAAGGAGTTCGAGATGACTGATATTGGATTGATGTCATACTACCTTGGCATTGAAGTAAAGCAAGAAGAAAATGGAATCTTCATTACTCAAGAAGGCTATGCTAAAGAGGTGCTTAAGAAGTTCAAGATGGATGACTCAAATCCAGTATGCACGCCAATGGAATGTGGAGTCAAGTTGTCAAAGG

>mustard greens9

ATGACACATGGGAGTTAGCTTCACTTCCACATGGGCATAAAGCAATTGGTGTTAAGTGGGTGTACAAAGCAAAGAAGAATTCTAAAGGAGAAGTTGAAAGGTACAAGGCAAGATTGGTGGCGAAAGGCTATAGTCAAAGAGCCGGAATCGACTATGATGAGGTATTTGCCCCTGTCGCTCGTTTAGAAACTGTTAGACTAATCATTTCATTGGCGGCCCAAAAGAGTTGGAGGATACATCAAATGGATGTAAAATATGTCTTCTTAAATGGAGACCTTGAAGAAGAAGTCTACATTGAGCAACCAGAAGGCTACGTAGTCAAAGGAGAAGAAGACAAAGTCTTAAGTCTGAAGAAGGCGCTTTATGGATTAAAGCAAACACCAAGAGCATGGAACACTCGGATTGATAAGTACTTCAAGGAGAATGGCTTGATCAAGTGTCTATATGAGCATGCACTTTATATCAAAACTCAAAACAATGATATATTGATTGCATGCTTATATGTTGATGACTTGATATTCACTGGCAACAAGCCGATTATGTTTGAAGATTTCAAGATGGAGATGACAAAGGAGTTCGAGATGACCGACATTGGACTAATGTCATACTACCTTGGCATTGAAGTAAAGCAAGAAGAAAATTGAATCTTCATTACTCAAGAAGGCTATGCAAAAGAGGTACTTAAGAAGTTCAAGATGGATGACTCAAATCCAGTTTGCACGCCAATGGAATGTGGAGTCAAGTTGTCAAAGG

>mustard greens10

ATGATACATGGGAGTTAGCTTCACTTCCACATGGGCATAAAGCAATTGGTGTTAAGTGGGTGTACAAAGCAAAGAAGAATTCTAAAGGAGAAGTTGAAAGGTACAAGGCAAGATTGGTGGCAAAAGGCTATAGTCAAAGAGCCGGGATCGACTATGATGAAGTATTTGCTCCAGTTGCTCGCTTAGAAACGGTTAGACTAATCATTTCATTGGCAGCCCAAAAGAGTTGGAGGATACATCAAATGGATGTAAAATCAGCCTTCTTAAATGGAGACCTTGAAGAAGAAGTCTACATTGAGCAACCACAAGGCTACATAGTCAAAGGAGAAGAAGACAAAGTCTTAAGGCTGAAGAAGGCGCTTTATGGATTAAAGCAAGCACCAAGAGCATGGAACACTCGGATTGATAAGTACTTCAAGGAGAAAGGCTTCATCAAGTGTCCATATGAGCATGCACTTTATATCAAAACTCAAAACAATGATATATTGATTGCATGCTTATATGTTGATGACTTGATATTCACTGGCAACAATCCGATTATGTTTGAAGACTTCAAGATGGAGATGACAAAGGAGTTCGAGATGACCGACATTGGATTAATGTCATACTACCTTGGCATTGAAGTAAAGCAAGAAGAAAATGGAATCTTCATTACTCAAGTAGGCTATGCAAAAGAGGTGCTTAAGAAGTTCAAGATGAATGACTCAAATCCAGTTTGCACGCCAATGGAATGTGGAGTCAAGTTGTCAAAGG

>mustard greens11

ATGATACATGGGAGTTAGCTTCACTTCCAAATGGACACAAGGCAATTGGTGTGAAGTGGGTGTACAAGGCAAAGAAGAACTCTAAAGGAGAAGTTGAAAGGTACAAGGCAAGATTGGTGGCAAAAGGCTATAGTCAAAGAGCCGGGATCGACTATGATGAAGTATTTGCTCCAGTTGCTCGCTTAGAAACGGTTAGACTAATCATTTCATTGGCAGCCCAAAAGAGTTGGAGGATACATCAAATGGATGTAAAATCAGCCTTCTTAAATGGAGACCTTGAAGAAGAAGTCTACATTGAGCAACCACAAGGCTACATAGTCAAAGGAGAAGAAGACAAAGTCTTAAGTCTGAAGAAGGCGCTTTATGGATTAAAGCAAACACCAAGAGCATGGAACACTCGGATTGATAAGTACTTCAAGGAGAATGGCTTGATCAAGTGTCTATATGAGCATGCACTTTATATCAAGACTCAAAACAATGATATATTGATTGCATGCTTATATGTTGATGACTTGATATTCACTGGCAACAAGCCGATTATGTTTGAAGATTTCAAGATGGAGATGACAAAGGAGTTCGAGATGACCGACATTGGACTAATGTCATACTACCTTGGCATTGAAGTAAAGCAAGAAGAAAATTGAATCTTCATTACTCAAGAAGGCTATGCAAAAGAGGTACTTAAGAAGTTCAAGATGGATGACTCAAATCCAGTTTGCACGCCAATGGAATGTGGAGTCAAGTTGTCAAAGG

>mustard greens12

ATGACACATGGGAGTTAGCTTCACTTCCACATGGGCATAAAGCAATTGGTGTTAAGTGGGTGTACAAAGCAAAGAAGAATTCTAAAGGAGAAGTTGAAAGGTACAAGGCAAGATTGGTGGCGAAAGGCTATAGTCAAAGAGCCGGAATCGACTATGATGAGGTATTTGCCCCTGTCGCTCGTTTAGAAACTGTTAGACTAATCATTTCATTGGCAGCCCAAAAGAGTTGGAAGATACATCAAATGGATGTCAAATCAGCCTTCTTAAATGGAGATCTTGAGGAAGAAGTTTACATTGAGCAACCACAAGGCTACAAAGTCAAAGGAGAAGAAGACAAAGTCTTAAGGCTTAAGAAGGCGCTATATGGATTAAAGCAAGCACCAAGAGCATGGAACACTCGGATTGATAAGTACTTCAAGGAGAAAAGCTTCATCAAGTGTCCATATGAGCATGCACTTTATATCAAAACTCAAAACAATGATATATTGATTGCATGCTTGTATGTGGATGACTTGATATTCACCGGCAACAATCCGAGTATGTTTGAAGCCTTCAAGAAGGAGATGACAAAGGAGTTCGAGATGACTGATATTGGATTGATGTCATACTACCTTGGCATTGAAGTAAAGCAAGAAGAAAATAGAATCTTAATTACTCAAGAAGGCTATGCTAAAGAGGTGCTTAAGAAGTTCAAGATGGATGACTCAAATCCAGTATGCACGCCAATGGAATGTGGAGTCAAGTTGTCAAAGG

>mustard greens13

ATGATACATGGAAGTTAGCTTCACTTCCAAATGGACACAAGGCAATTGGTGTAAAGTGGGTGTACAAGGCAAAGAAGAACTCTAAAAGAGAAGTTGAAAGGTACAAGGCAAGATTGGTGGAAAAAGGCTATAGTCAAAGAGCCGGGATCGACTATGATGAAGTATTTGCTCCAGTTGCTCGCTTTGAAACGATTAGACTAATCATTTCATTGGCGGCCCAAAAGAGTTGGAGGATACATCAAATGGATGTAAAATATGTCTTCTTAAATGGAGACCTTGAAGAAGAAGTCTACATTGAGCAACCAGAAGGCTACGTAGTCAAAGGAGAAGAAGACAAAGTCTTAAGTCTGAAGAAGGCGCTTTATGGATTAAAGCAAACACCAAGAGCATGGAACACTCGGATTGATAAGTACTTCAAGGAGAATGGCTTGATCAAGTGTCTATATGAGCATGCACTTTATATCAAAACTCAAAACAATGATATATTGATTGCATGCTTATATGTTGATGACTTGATATTCACTGGCAACAAGCCGATTATGTTTGAAGATTTCAAGATGGAGATGACAAAGGAGTTCGAGATGACCGACATTGGACTAATGTCATACTACCTTGGCATTGAAGTAAAGCAAGAAGAAAATTGAATCTTCATTACTCAAGAAGGCTATGCAAAAGAGGTACTTAAGAAGTTCAAGATGGATGACTCAAATCCAGTTTGCACGCCAATGGAATGTGGAGTCAAGTTGTCAAAGG

>mustard greens14

ATGACACATGGGAGTTAGCTTCACTTCCACATGGGCATAAAGCAATTGGTGTTAAGTGGGTGTACAAAGCAAAGAAGAATTCTAAAGGAGAAGTTGAAAGGTACAAGGCAAGATTGGTGGCGAAAGGCTATAGTCAAAGAGCCGGAATCGACTATGATGAGGTATTTGCCCCTGTCGCTCGTTTAGAAACTGTTAGACTAATCATTTCATTGGCAGCCCAAAAGAGTTGGAAGATACATCAAATGGATGTCAAATCAGCCTTCTTAAATGGAGATCTTGAGGAAGAAGTTTACATTGAGCAACCACAAGGCTACAAAGTCAAAGGAGAAGAAGACAAAGTCTTAAGGCTTAAGAAGGCGCTATATGGACTAAAGCAAGCACCAAGAGCATGGAACACTCGGATTGATAAGTACTTCAAGGAGAAAAGCTTCATCAAGTGTCCATATGAGCATGCACTTTATATCAAAACTCAAAACAATGATATATTGATTGCATGCTTGTATGTGGATGACTTGATATTCACCGGCAACAATCCGAGTATGTTTGAAGTCTTCAAGAAGGAGATGACAAAGGAGTTCGAGATGACTGATATTGGATTGATGTCATACTACCTTGGCATTGAAGTAAAGCAAGAAGAAAATAGAATCTTAATTACTCAAGAAGGCTATGCTAAAGAGGTGCTTAAGAAGTTCAAGATGGATGACTCAAATCCAGTATGCACGCCAATGGAATGTGGAGTCAAGTTGTCAAAGG

>mustard greens15

ATGATACATGGAAGTTAGCTTCACTTCCAAATGGACACAAGGCAATTGGTGTAAAGTGGGTGTACAAGGCAAAGAAGAACTCTAAAAGAGAAGTTGAAAGGTACAAGGCAAGATTGGTGGAAAAAGGCTATAGTCAAAGAGCCGGGATCGACTATGATGAAGTATTTGCTCCAGTTGCTCGCTTAGAAACGGTTAGACTAATCATTTCATTGGCAGCCCAAAAGAGTTGGAAGATACATCAAATGGATGTCAAATCAGCCTTCTTAAATGGAGATCTTGAGGAAGAAGTTTACATTGAGCAACCACAAGGCTACAAAGTCAAAGGAGAAGAAGACAAAGTCTTAAGGCTTAAGAAGGCGCTATATGGACTAAAGCAAGCACCAAGAGCATGGAACACTCGGATTGATAAGTACTTCAAGGAGAAAAGCTTCATCAAGTGTCCATATGAGCATGCACTTTATATCAAAACTCAAAACAATGATATATTGATTGCATGCTTGTATGTGGATGACTTGATATTCACCGGCAACAATCCGAGTATGTTTGAAGTCTTCAAGAAGGAGGTGACAAAGGAGTTCGAGATGACTGATATTGGATTGATGTCATACTACCTTGGCATTGAAGTAAAGCAAGAAGAAAATAGAATCTTAATTACTCAAGAAGGCTATGCTAAAGAGGTGCTTAAGAAGTTCAAGATGGATGACTCAAATCCAGTATGCACGCCAATGGAATGTGGAGTCAAGTTGTCAAAGG

>mustard greens16

ATGATACATGGGAGTTAGCTTCACTTCCAAATGGACACAAGGCAATTGGTGTGAAGTGGGTGTACAAGGCAAAGAAGAACTCTAAAGGAGAAGTTGAAAGGTACGAGGCAAGATTGGTGGCAAAAGGCTATAGTCAAAGAGCCGGGATCGACTATGATGAGGTATTTGCTCCAGTTGCTCGCTTAGAAACGGTTAGACTAATCATTTCATTGGCAGCCCAAAAGAGTTGGAAGATACATCAAATGGATGTCAAATCAGCCTTCTTAAATGGAGATCTTGAGGAAGAAGTTTACATTGAGCAACCACAAGGCTACAAAGTCAAAGGAGAAGAAGACAAAGTCTTAAGGCTTAAGAAGGCGCTATATGGACTAAAGCAAGCACCAAGAGCATGGAACACTCGGATTGATAAGTACTTCAAGGAGAAAAGCTTCATCAAGTGTCCATATGAGCATGCACTTTATATCAAAACTCAAAACAATGATATATTGATTGCATGCTTGTATGTGGATGACTTGATATTCACCGGCAACAATCCGAGTATGTTTGAAGCCTTCAAGAAGGAGATGACAAAGGAGTTCGAGATGACTGATATTGGATTGATGTCATACTACCTTGGCATTGAAGTAAAGCAAGAAGAAAATGGAATCTTCATTACTCAAGAAGGCTATGCTAAAGAGGTGCTTAAGAAGTTCAAGATGGATGACTCAAATCCAGTATGCACGCCAATGGAATGTGGAGTCAAGTTGTCAAAGG

>mustard greens17

ATGATACATGGGAGTTAGCTTCACTTCCAAATGGACACAAGGCAATTGGTGTGAAGTGGGTGTACAAGGCAAAGAAGAACTCTAAAGGAGAAGTTAAAAGGTACAAGGCAAGATTGGTGGCAAAAGGCTATAGTCAAAGAGCCGGGATCGACTATGATGAGGTATTTGCTCCAGTTGCTCGCTTAGAAACGGTTAGACTAATCATTTCATTGGCAGCCCAAAAGAGTTGGAGGATACATCAAATGGATGTAAAATCAGCCTTCTTAAATGGAGACCTTGAAGAAGAAGTCTACATTGAGCAACCACAAGGCTACATAGTCAAAGGAGAAGAAGACAAAGTCTTAAGGCTGAAGAAGGCGCTTTATGGATTAAAGCAAGCACCAAGAGCGTGGAACACTCGGATTGATAAGTACTTCAAGGAGAAAGGCTTCATCAAGTGTCCATATGAGCATGCACTTTATATCAAAACTCAAAACAATGATATATTGATTGCATGCTTATATGTTGATGACTTGATATTCACTGGCAACAATCCGATTATGTTTGAAGATTTCAAGATGGAGATGACAAAAGAGTTCGAGATGACCGACATTGGACTAATGTCATACTACCTTGGCATTGAAGTAAAGCAAGAAGAAAATGGAATCTTCATTACTCAAGAAGGCTATGCAAAAGAGGTGCTTAAGAAATTCAAGATGGATGACTCAAATCCAGTTTGCACGCCAATGGAATGTGGAGTCAAGTTGTCAAAGG

>mustard greens18

ATGATACATGGGAGTTAGCTTCACTTCCACATGGGCATAAAGCAATTGGTGTTAAGTGGGTGTACAAAGCAAAGAAGAATTCTAAAGGAGAAGTTGAAAGGTACAAGGCAAGATTGGTGGCGAAAGGCTATAGTCAAAGAGCCGGAATCGACTATGATGAGGTATTTGCCCCTGTCGCTCGTTTAGAAACTGTTAGACTAATCATTTCATTGGCAGCCCAAAAGAGTTGGAAGATACATCAAATGGATGTCAAATCAGCCTTCTTAAATGGAGATCTTGAGGAAGAAGTTTACGTTGAGCAACCACAAGGCTACAAAGTCAAAGGAGAAGAAGACAAAGTCTTAAGGCTTAAGAAGGCGCTATATGGATTAAAGCAAGCACCAAGAGCATGGAACACTCGGATTGATAAGTACTTCAAGGAGAAAAGCTTCATCAAGTGTCCATATGAGCATGCACTTTATATCAAAACTCAAAACAATGATATATTGATTGCATGCTTGTATGTGGATGACTTGATATTCACCGGCAACAATCCGAGTATGTTTGAAGCCTTCAAGAAGGAGATGACAAAGGAGTTCGAGATGACTGATATTGGATTGATGTCATACTACCTTGGCATTGAAGTAAAGCAAGAAGAAAATGGAATCTTCATTACTCAAGAAGGCTATGCAAAAGAGGTGCTTAAGAAGTTCAAGATGAATGACTCAAATCCAGTTTGCACGCCAATGGAATGTGGAGTCAAGTTGTCAAAGG

>mustard greens23

ATGATACATGGAAGTTAGCTTCACTTCCAAATGGACACAAGGCAATTGGTGTAAAGTGGGTGTACAAGGCAAAGAAGAACTCTAAAAGAGAAGTTGAAAGGTACAAGGCAAGATTGGTGGAAAAAGGCTATAGTCAAAGAGCCGGGATCGACTACGATGAAGTATTTGCTCCAGTTGCTCGCTTTGAAACGATTAGACTAATCATTTCATTGACGGCCCAAAAGAGTTGGAGGATACATCAAATGGATGTAAAATATGTCTTCTTAAATGGAGACCTTGAAGAAGAAGTCTACATTGAGCAACCACAAGGCTACATAGTCAAAGGAGAAGAAGACAAAGTCTTAAGGCTGAAGAAGGCGCTTTATGGATTAAAGCAAGCACCAAGAGCATGGAACACTCGGATTGATAAGTACTTCAAGGAGAAAGGCTTCATCAAGTGTCCATATGAGCATGCACTTTATATCAAAACTCAAAACAATGATATATTGATTGCATGCTTATATGTTGATGACTTGATATTCACTGGCAACAAGCCGATTATGTTTGAAGATTTCAAGATGGAGATGACAAAGGAGTTCGAGATGACCGACATTGGACTAATGTCATACTACCTTGGCATTGAAGTAAAGCAAGAAGAAAATTGAATCTTCATTACTCAAGAAGGCTATGCAAAAGAGGTACTTAAGAAGTTCAAGATGGATGACTCAAATCCAGTTTGCACGCCAATGGAATGTGGAGTCAAGTTGTCAAAGG

>mustard greens24

ATGATACATGGGAGTTAGCTTCGCTTCCAAATGGACACAAAGCAATTGGTGTGAAGTGGGTGTACAAGGCAAAGAAGAACTCTAAAGGAGAAGTTGAAAGGTACAAGGTAAGATTGGTGGCAAAAGGCTATAGTCAAAGAGCCGGGATCGACAACGATGAGGTATTTGCTCCAATTGCTTGCTTAGAAATGATTATACTAATCATTTCATTGGCAGCCCAAAAGAGTTGGAGGATACATCAAATAGATGTAAAATCAGCCTTCTTAAATAAAGACCTTGAGAAAGAAGTCTACATTGAGCAACCACAAGGCTACATAGTCAAAGGAGAAGAAGACAACGTCTTAAGGCTGATGAAAGCGCTTTATGGATTAAAACAAGCACCAAGAGCATGGAACACTCGGATTGATAAATACTTCAAGGAGAAAGGCTTCATCAAGTGTCCATATGAGCATGCACTTTATATCAAAACTCAAAACAATGATATATTGATTGCATGCTTATATACTGATGACTTGATATTCACTGGCAACAATCCGATTATGTTTGAAGATTTCAAGATGGAGATGACAGAGGAGTTCGAGATGACCGATATTGGATTGATGTCATACTACCTTGGCATTGAAGTAAAGCAAGAAGAAAATGGAATCTTTATTGCTCAAGAAGGCTTTGCAAAAGAGGTGCTTAAGAAGTTCAAGATGGATGACTCAAATCCAGTTTGCACGCCAATGGAATGTGGAGTCAAGTTGGCAAAGG

>mustard greens25

ATGATACATGGGAGTTAGCTTCACTTCCAAATGGACACAAGGCAATTGGTGTGAAGTGGGTGTACAAGGCAAAGAAGAACTCTAAAGGAGAAGTTGAAAGGTACAAGGCAAGATTGGTGGCAAAAGGCTATAGTCAAAGAGCCGGGATCGACTATGATGAGGTATTTGCTCCAGTTGCTCGCTTAGAAACGGTTAGACTAATTATTTCATTGGCAGCCCAAAAAAGTTGGAGGATACATCAAATGGATGTAAAATCAGCCTTCTTAAATGGAGACCTTGAAGAAGAAGTCTACATTGAGCAACCACAAGGCTACATAGTCAAAGGAGAAGAAGACAAAGTCTTAAGGCTGAAGAAGGCGCTTTATGGATTAAAGCAAGCACCAAGAGCATGGAACACTCGGATTGATAAGTACTTCAAGGAGAAAGACTTCATCAAGTGTCCATATGAGCATGCACTTTATATCAAAACTCAAAACAATGATATATTGATTGCATGCTTATTTGTTGATGACTTGATATTCACTGGCAACAATCCGATTATGTTTGAAGACTTCAAGATGGAGATGACAAAGGAGTTCGAGATGACCGACATTGGATTAATGTCATACTACCTTGGCATTGAAGTAAAGCAAGAAGAAAATGGAATCTTCATTACTCAAGAAGGCTATGCAAAAGAGGTGCTTAAGAAGTTCAAGATGAATGACTCAAATCCAGTTTGCACGCCAATGGAATGTGGAGTCAAGTTGTCAAAGG

>mustard greens26

ATGACACATGGGAGTTAGCTTCACTTCCACATGGGCATAAAGCAATTGGTGTTAAGTGGGTGTACAAAGCAAAGAAGAATTCTAAAGGAGAAGTTGAAAGGTACAAGGCAAGATTGGTGGCGAAAGGCTATAGTCAAAGAGCCGGAATCGACTATGATGAGGTATTTGCCCCTGTCGCTCGTTTAGAAACTGTTAGACTAATCATTTCATTGGCAGCCCAAAAGAGTTGGAAGATACATCAAATGGATGTCAAATCAGCCTTCTTAAATGGAGATCTTGAGGAAGAAGTTTACATTGAGCAACCACAAGGCTACAAAGTCAAAGGAGAAGAAGACAAAGTCTTAAGGCTTAAGAAGGCGCTATATGGACTAAAGCAAGCACCAAGAGCATGGAACACTCGGATTGATAAGTACTTCAAGGAGAAAAGCTTCATCAAGTGTCCATATGAGCATGCACTTTATATCAAAACTCAAAACAATGATATATTGATTGCATGCTTGTATGTGGATGACTTGATATTCACCGGCAACAATCCGAGTATGTTTGAAGTCTTCAAGAAGGAGATGACAAAGGAGTTCGAGATGACTGATATTGGATTGATGTCATACTACCTTGGCATTGAAGTAAAGCAAGAAGAAAATAGAATCTTAATTACTCAAGAAGGCTATGCTAAAGAGGTGCTTAAGAAGTTCAAGATGGATGACTCAAATCCAGTATGCACGCCAATGGAATGTGGAGTCAAGTTGTCAAAGG

>brussels sprout1

ATGATACATGGGAGTTAGCTTCACTTCCAAATGGACACAAGGCAATTGGTGTGAAGTGGGTGTACAAGGCAAAGAAGAACTCTAAAGGAGAAGTTGAAAGGTACAAGGCAAGATTAGTGGCAAAATGCTATAGTCAAAGATCCGGGATCGACTATGATGAGGTATTTGCTCCAGTTGCTCGCTTAGAAACGGTTAGACAAATCATTTCATTGGCAGCCCAAAAGAGTTGGAGGATACATCAAATGGATGTAAAATCAGCCTTCTTAAATGGAGACCTTGAGGAAGAAGTCTACATTGAGCAACCACAAGGCTACATAGTTAAAGAAGAAGAAGACAAAGTCTTAAGGCTGAAGAAGGCGCTTTATGGATTAAAGCAAGCACCAAGAGCATGGAACACTCGGATTGATAAGTACTTCAAGGAGAAAGGCTTCATCAAGTGTCCATATGAGCATTCACTTTATATCAAAACTCAAAACAATGATATATTGATTGCATGCTTATATGTTGATGACTTGATATTCACTGGCAACAATCCGATTATGTTTGAAGATTTCAAGATGGAGATGACAAAGGAGTTTGAGATGACCGACATTGGATTAATGTCATACTACCTTGGCATTGAAGTAAAGCAAGAAGAAAGTGGAATCTTCATTACTCAAGAAGGTTATGCTAAAGAGGTGCTTAAGAAGTTCAAGATGAATGACTCAAATCCAGTTTGCACG

>brussels sprout2

ATGATACATGGGAGTTAACTTCACTTCCTAATGGGCATAAAGCAATTGGTGTGAAGTGGGTGTACAAGGCAAAGAAGAACGCTAAAGGAGAAGTTGAAAGATACAAGGCAAGACTAGTGGCTAAAGGCTATAGTCAAAGAGCCGAGATCGACTATGATGTGGTATTTGCTCCTGTTGCTCGCTTAGAAATGGTTAGATTAATCATTTCATTGGTAGCCCAAAATAGTTGGAAGATACATCAAATGGATGTCAAATCAGCTTTCTTACATAGAAACCTTGAGGAAGAAGTCTACATTGAGCAACCACAAGGCTACATAGTTAAAGGAGAAGAAGACAAAGTCTTAAGGCTGAAGAAGGCGCTTTATGGATTAAAGCAAGCACCAAGAGCATGGAACACTCGGATTGATAAGTACTTCAAGGAGAAAGGCTTCATCAAATGTCCATATGAGTATGCACTTTATATCAAAACTCAAAACAATGATCTATTGATTGCATGCTTATATATTGATGACTTGATATTCACTGGCAACAATCCGATTATGTTTGAAGATTTCAAGATGGAGATGACAAAGGAGTTCGAGATGACCGACATTGGATTGATGTCATACTACCTTGGCATTGAAGTAAAGCAAGAAGAAAATGGAATCTTCATTACTCAAGAAGGCTATGCTAAAGAGGTGCTTAAGAAGTTCAAGATGGATGACTCAAATCCAGTTTGCACG

>brussels sprout3

ATGATACATGGGAGTTAGCTTCACTTCCAAATGGACACAAGGCAATTGGTGTGAAGTGGGTGTACAAGGCAAAGAAGAACTCTAAAGGAGAAGTTGAAAGGTACAAGGCAAGATTAGTGGCAAAAGGCTATAGTCAAAGAGCCGGGATCGACTATGTTGAGGTATTTGCTCCAGTTGCTCGCTTAGAAACGGTTAGACTAATCATTTCATTGGCAGCCCAAAAGAGTTGGAGGATACATCAAATGGATGTAAAATCAGCCTTCTTAAATGGAGACCTTGAGGAAGAAGTCTACATTGAGCAACCACAAGGCTACATAGTCAAAGGAGAAGAAGACAAAGTCTTAAGGCTGAAGAAGGCGCTTTATGGATTAAAGCAAGGATCAAGAGCATGGAACACTCGGATTGATAAGTACTTCAAGGAGAAAGGCTTCATCAAGTGTCCATATGAGCATGCACTTTCAATCAAAACTGAAAACAATGATATATTGATTGCATGCTTATATGTTGATGACTTGATATTCACTGGCAACAATCCAATTATGTTTGAAGATTTCAAGATGGAGATGGCAAAGGAGTTCAGGATAACCGACATTTGATTGATGTCATACTACCTTGGCATTGAAGTAAAGCAAGAAGAAAATGGAATCTTCATTACTCAAGAAGGCTATGCTAAAGAGGTGCTTAAGAAGTTCAAGACGGATGACTCAAATCCAGTTTGCACG

>brussels sprout4

ATGATACATGGGAGTTAGCTTCACTTCCAAATGGACACGAGGCAATTCGTGTGAAGTGGGCGTACAAGGCAAAGAAGAACTCTAAAGGAGAAGTTGAAAGGTACAAGGCAAGATTGGTGGCAAAAGGCTATAGTCGAAGAGCCGGGATCGACTATGATGAGGTATTTGCTCCAGTTGCTCGCTTAGAAACGGTTAGACTAATCATTTCATTGGCAGCCCAAAAGAGTTGGAGGATACATCAAATGGATGTCAAATCAGCCTTCTTAAATGGAGACCTTGAGGAAAAAGTCTACATTGAGCAACCACAAGGCTACATAGTTAAAGGAGAAGAAGACAAAGTCTTAAGGCTGAAGAAGGCGCTTTATGGATTAAAGCAAGCACAAAGAGCATGGAACACTCGGATTGATAAGTATTTCAAGGAGAAATGTTTCATCAAGTGTCCATATGAGCATGCACTTTATATCAAAACTCAAAACAATGATATATTGATTGCATGCTTATATGTTGATGACTTAATATTCACTGGCAACAATCCGATTATGTTTGAAGATTTCAAGATGGAGATGACAAAAGAGTTCGAGATGACCGACATTGGATTGATGTCATACTACCTTGGCATTGAAGTAAAGTAAGAAGAAAATGGAATCTTCAGTACTCAAGAAGGCTATGCTAAAGAGGTGCTTAAGAAGTTCAAGATGGATGACTCAAATCCAGTTTGCACG

>brussels sprout5

ATGATACATGGGAGTTAGCTTCACTTCCAAATGGACACAAGGCAATTGGTGTGAAGTGGGTGTACAAGGCAAAGAAGAACTCTAAAGGAGAAGTTGAAAGGTACAAGGCAAGATTGGTGGCAAAAGGCTATAGTCAAAGAGCCGAGATCGACTATGATGAGGTATTTGCTCCAGTTGCTCGCTTAGAAACGGTTAGACTAATCATTTCATTGGCAGCCCAAAAGAGTTGGAGGATACATCAAATGTATGTAAAATCAGCCTTCTTAAATGGAGACCTTAAGGAAGAAGTCTACACTGAGCAACCACAAGGCTATATAGTCAAAGGAGTAGAAGACAAAGTCTTAAGGCTAAAGAAGGCGCTTTATGGATTAAAACAAGCACCAAGAGCATGGAACACTCGGATTGATAAGTACTTCAAGGAGAAAGGATTCATCAAGTGTCCATATGAGCATGCACTTTATATCAAAACTCAAAATAATGATCTATTGATTGCATGTTTATATGTTGATGACTTGATTTTCACTGGCAACAATCCGATTATGTTTGAAGATTTCAAGATGGAGATGACAAAGAAGTTCGAGATGACCGACATTGGATTGGTGTCATACTACCTTGGCATTGAAGTAAAGCAAGAAGAAAATGGAATCTTCATTACTCAAGAAGGTTATGCTAAAGAGGTCCTTAAGAAGTTCAAAATGGATGACTCAAATCCAGTTTGCATG

>brussels sprout7

ATGATACATGGGAGTTAGCTTCACTTCCAAATGGACACAAGGCAATTGGTGTGAAGTGGGTGTACAAGGCAAAGAAGAACTCTAAAGGAGAAGTTGAAAGGTACAAGGCAAGATTAGTGGCAAAAGGCTATAGTCAAAGAGCCGGGATCGACTATGATGAGGTATTTGCTCTAGTTGCTCGCTTAGAAATGGTTAGACTAATCATTTCATTGGCAGCCCAAAAGAGTTGGAGGATACATCAAATGGATGTAAAATCAGCCTTCTTAAATGGAGACCTTGAGGAAGAAGTCTACATTGAGCAACCACAAGGCTACATAGTTAAAGGAGAAGAAGACAAAGTCTTAAGGCTGAAGAAGGCGCTTTATGGATTAAAGCAAGCACCAAGAGCATGGAACACTCGGATTGATAAGTACTTCAAGGAGAAATGCTTCATCAAGTGTCCATATGAGCATGCACTTTATATCAAAACTCAAAACAATGATATATTGATTGCATGCTTATATGTTGATGACTTGATATTCACTGGCAACAATCCGATTATGTTTGAAGATTTCAAGATGGAGATGACAAAGGAGTTCGAGATGACCGACATTGGATTGATGTCATACTACCTTGGCATTGAAGTAAAGCAAGAAGAAAATGGAATCTTCATTACTCAAGAAGGCTATGCTAAAGAGGTGCTTAAGAAGTTCAAGATGGATGACTCAAATCCAGTTTGCACG

>brussels sprout9

ATGATACATATGAGTTAGCTTCACTTCCAAATGGGCATAAATCAATCGGTGTGAAGTGGGTGTACAAGGCTAAGAAGAATTCTAAAGGAGAAGTTGAAAGATACAAGGCAAGATTGGTGGCGAAAGGCTATAGTCAAAGAGCCGAGATCGACTATGATGAGGTATTTGCTCCAGTTGCTCGCTTAGAAATGGTTAGACTAATCATTTCATTGGCAGCCCAAAAAATTTGGAGGATACATCAAATGGATGTAAAATCAGCCTTCTTAAATGGAGACCTTGAGGAAGAAGTCTACATTGAGCAACCACAAGGCTACATAGTTAAAGGAGAAGAAGATAAAGTCTAGAGGGTGAAGAAGGCGCTTTATGGATTAAAGCAAGGATCAAGAGCATGGAACACTCGGATTGATAAGTACTTCAAGGAGAAAGGCTTCATCAAGTGTCCATATGAGCATGCACTTTATATCAAAACTCAAAACAATGATATATCGATTACATGCTTATATGTTGATGACTTGATATCCACTGGCAACAATCCGATTATGTTTGAAGATTTCAAGATGGAGATGACAAAGGAGTTTGAGATGACCGACATTGGATTAATGTCATACTACCTTGGCATTGAAGTAAAGCAAGAAGAAAATGGAATCTTCATTAGTCAAGAAGGTTATGCTAAAGAGGTGCTTAAGAAGTTCAAGATGGGTGACTCAAACCCAGTTTGCACG

>brussels sprout10

ATGACACATTGGAGTTAGCTTTAATTCCAAATGGACACAAGGCAATTGGTGTGAAGTGGGTGTACAAGGCAAAGAAGAACACTAAAGGAGAAGTTGAAAGGTACAAGGCAAAATTGGTGGCAAAAGGCTATAGCCAAAGAGCTGGGATCGACTATGATGAGGTATTTGCTCCAGTTGCTCGCTTAGAAACGGTTAGACTAATCATTTCATTGGCAGCCCAAAAGAGTTGGAGGATACATCAAATGGATGTAAAATCAGCCTTTTTAAATGGAAAACTTGAGGAAGAAGTCCACATTGAGCAACCACAAGGCTACATAGTCAAAGGAGAAGAAGACAAAGTCTTAAGACTGAAGAAGGCGCTTTATGGATTAAAGCAAGCACCAAGAGCATGGAACACTCGAATTGATAAGTGCTTCAAGGAGAAAGGCTTCATCAAGTGTCCATATGAGCGTGCACTTTATATCAAAACTCAAAACAATGATCTATTGATTGCATGCTTATATGTTGATGACTTGATATTAACTGGCAACAATCCGATTATGTTTGAAGGTTTCAAGATGGAGATGGCAAAGGAGTTCGAGATGACCGACATTGTATTGATGTCATACTACCTTGGCATTGAAGTAAAGCAAGAAGAAAATGGAATCTTCATTACTCAAGAAGGCTATGCTAAAGAGGTGCTTAAGAAGTTCAAGATGGATGACTCAAATCCAGTTTGCACG

>brussels sprout11

ATGATACATATGAGTTAGCTTCACTTCCAAATGGGCATAAATCAATCGGTGTGAAGTGGGTGTACAAGGCTAAGAAGAATTCTAAAGGAGAAGTTGAAAGATACAAGGCAAGATTGGTGGCGAAAGGCTATAGTCAAAGAGCCGAGATCGACTATGACGAGGTATTTGCTCCAGTTGCTCGCTTAGAAATGGTTAGACTAATCATTTCATTGGCAGCCCAAAAAATTTGGAGGATACATCAAATGGATGTAAAATCAGCCTTCTTAAATGGAGACCTTGAGGAAGAAGTCTACATTGAGCAACCACAAGGCTACATAGTTAAAGGAGAAGAAGATAAAGTCTAGAGGGTGAAGAAGGCGCTTTATGGATTAAAGCAAGGATCAAGAGCATGGAACACTCGGATTGATAAGTACTTCAAGGAGAAAGGCTTCATCAAGTGTCCATATGAGCATGCACTTTCAATCAAAACTGAAAACAATGATATATTGATTGCATGCTTATATGTTGATGACTTGATATTCACTGGCAACAATCCAATTATGTTTGAAGATTTCAAGATGGAGATGGCAAAGGAGTTCAGGATAACCGACATTTGATTGATGTCATACTACCTTGGCATTGAAGTAAAGCAAGAAGAAAATGGAATCTTCATTACTCAAGAAGGCTATGCTAAAGAGGTGCTTAAGAAGTTCAAGACGGATGACTCAAATCCAGTTTGCACG

>brussels sprout12

ATGATACATGGGAGTTAGCTTCACTTCCAAATAGACACAAGGCAATTGGCGTGAAGTGGGTGTACAAGGCAAGGAAGAACTCTAAAGGAGAAGTTGAAAGGTACAAGGCAAGATTGGTGGCAAAAGGCTATTGTCAAAGAGCCGGGATCGACTATGATGAGGTATTTGCTCCAGTTGCTCGCTTAGAAACGGTTAGACTAATCATTTCATTGGCAGCCCAAAAGAGTTGGAGGATACATCAAATGGATGTAAAATCAGCCTTCTTAAATGGAGACCTTGAGGAAGAAGTCTACATTGAGCAACCACAAGGCTACATAGTCAAAGGGGAAGAAGACAAAGTCTTAAGGCTGAAGAAGGCCCTTTATGGATTAAAGCAAGCACCAAGAGCATGGAACACTCGGATTGATAAGTACTTCAAGGAGAAAGGCTTCATCAAGTGTCCATATGAGCATGCACTTTATATCAAAACTCAAAACAATGATCTATTGATTGCATGCTTATATGTTGATGACTTGATATTCACTGGCAACAATCCGATTATGTTTGAAGATTTCAAGATGGAGATGACAAAGGAGTTCGAGATGACCGACATTGGATTGATGTCATACTACCTTGGCATTGACGTAAAGCAAGATGAAAATGGAATCTTCATTACTCAAGAAGGCTATGTTAAAGAGGTGCTTAGGAAGTTCAAGATGGATGACTCAAATCCAGTTTGCACG

>brussels sprout13

ATGATACATGGTAGTTAGCTTCACTTCCAAATGGACACAAGGCAATTGGTGTGAAGTGGGTGTACAAGGCAAAGAAGAACTCTAAAGGAGAAGTTGAAAGGTACAAGGCAAGATTAGTGGCAAAAGGCTATAGTCAAAGAGCCGGGATCGACTATGATGAGGTATTTGCTCTAGTTGCTCGCTTAGAAATGGTTAGACTAATCATTTCATTGGCAGCCCAAAAGAGTTGGAGGATACATCAAATGGATGTAAAATCAGCCTTCTTAAATGGAGACCTTGAGGAAGAAGTCTACATTGAGCAACCACAAGGCTACATAGTCAAAGGAGAAGAAGACAAAGTCTTAAGGCTGAAGAAGGCGCTTTATGGATTAAAGCAAGCACCAAGAGCATGGAACACTCGGATTGATAAGTACTTCAAGGAGAAAAGCTTCATCAAGTGTCCATATGAGCATGCACTTTATATCAAAACTCAAAACAATGATATATTGATTGCATGCTTATATGTTGATGACTTAATATTCACTGGCAACAATCCGATTATGTTTGAAGATTTCAAGATGGAGATGACAAAAGAGTTCGAGATGACCGACATTGGATTGATGTCATACTACCTTGGCTTTGAAGTAAAGCAAGAAGAAAATGGAATCTTCATTACTCAAGAAGGCTATGCTAAAGAGGTGCTTAAGAAGTTCAAGATGGATGACTCAAATCCAGTTTGCACG

>brussels sprout14

ATGATACATGGGAGTTAGCTTCACTTCCAAATGGACACAAGGCAATTGGTGTGAGGTGGGTGTACAAGGCAAAGAAGAACTCTAAAGGAGAAGTTGAAAGGTACAAGGCAAGATTAGTGGCAAAAGGCTATAGTCAAAGAGCCGGGATCGACTATGATGAGGTATTTGCTCCAGTTGCTCGCTTAGAAACGGTTAGACTAATCATTTCATTGGCAGCCCAAAAGAGTTGGAGGATACATCAAATGGATGTAAAATCAGCCTTCTTAAATGGGGACCTTGAGGAAGAAGTCTACATTGAGCAACCACAAGGCTACATAGTCAAAGGAGAAGAAGACAAAGTCTTAAGGCTGAAGAAGGCGCTTTATGGATTAAAGCAAGCACCAAGAGCATGGAACACTCGGATTGATAAGTACTTCAAGGAGAAAAGCTTCATCAAGTGTCCATATGAGCATGCACTTTATATCAAAACTCAAAACAGTGATATATTGATTGCATGCTTATATGTTGATGACTTAATATTCACTGGCAACAATCCGATTATGTTTGAAGATTTCAAGATGGAGATGACAAAAGAGTTCGAGATGACCGACATTGGATTGATGTCATACTACCTTGGCATTGAAGTAAAGCAAAAAGAAAATGAAATCTTCATTACTCAAGAAGGCTATGCTAAAGAGGTGCTTAAGAAGTTCAAGATGGATGACTCAAATCCAGTTTAAACG

>brussels sprout15

ATGATACATGGGAGTTAGCTTCACTTCCAAATAGGCATAAATCAATCGGTGTGAAGTGGGTGTAAAAGGCTAAGCAGAATTCTAAAGGAGAAGTTGAAAGATACAAGGCAA------------AAGGCTATAGTCAAAGAGTCGGGGTCGACTATGATGAGGTATTTGCTTCAGTTGCTCGCTTAGAAACGGTTAGACTAATCATTTCATTGGCAGCCCAAAAGAGTTGGAGGATACATCAAATGGATGTCAAATCAGCCTTCTTAAATGGAGACCTTGAGGAAGAAGTCTACATTGAGCAACCACAAGGCTACATGGTTGAAGGAGAAGAAGACAAAGTCTTGAGGCTGAAGAAGGCGCTTTATGGATTAAAGTAAGCACCAAGAGCATGGAACACTCGGATTGATAAGTACTTCAAGGAGAAAAACTTCATCAAGTGTCCATATGAGCATGCACTTTATATCAAAACTCAAAACAATGATATATTGATTGCATGCTTATATGTTGATGATTTGATATTCACTGGCAACAATCCGATTATGTTTGAAGATTTCAAGATGGAGATGACAAAGGAGTTCGAGATGACCGACATTGGATTGATGTCATACTACCTTGGCATTGAAGTAAAGCAAGAAGAAAATGGAATCTTCATTACTCAAGAAGGATATGCTAAAGAGGTGCTTAAGAAGTTCAAGATGGATGACTCAAATCCAGTTTGCACG

>brussels sprout16

ATGACACATTGGAGTTAGCTTTAATTCCAAATGGACACAAGGCAATTGGTGTGAAGTGGGTGTACAAGGCAAAGAAGAACACTAAAGGAGAAGTTGAAAGGTACAAGGCAAAATTGGTGGCAAAAGGCTATAGCCAAAGAGCTGGGATCGACTATGATGAGGTATTTGCTCCAGTTGCTCGCTTAGAAACGGTTAGACTAATCATTTCATTGGCAGCCCAAAAGAGTTGGAGGATACATCAAATGGATGTCAAATCAGCCTTCTTAAATGGAGACCTTGAGGAAGAAGTCTACATTGAGCAACCACAAGGCTACATGGTTGAAGGAGAAGAAGACAAAGTCTTGAGGCTGAAGAAGGCGCTTTATGGATTAAAGCAAGCACCAAGAGCATGGAACACTCGGATTGATAAGTACTTCAAGGAGAAAGGCTTCATCAAGTGTCCATATGAGCATGCACTTTATATCAAAACTCAAAACAATGATATATTGATTGCATGCTTATATGTTGATGACTTGATATTCACGGGCAACAATCCGATTATGTTTGAAGATTTCAAGATGGAGATGACAAAGGAGTTTGAGATGACCGACATTGGATTGATGTCATACTACCTTGGCATTGAAGTAAAGCAGGAAGAGAATAGAATCTTCATTACTCAAGAAGGCTATGCTAAAGAGGTGCTTAAGAAGTTCAAGATGGATGACTCAAATCCAGTTTGCACG

>brussels sprout18

ATGATACATGGGAGTTAACTTCACTTCCTAATGGGCATAAAGCAATTGGTGTGAAGTGGGTGTACAAGGCAAAGAAGAACGCTAAAGGAGAAGTTGAAAGATACAAGGCAAGACTAGTGGCTAAAGGCTATAGTCAAAGAGCCGAGATCGACTATGATGTGGTATTTGCTCCTGTTGCTCGCTTAGAAATGGTTAGATTAATCATTTCATTGGTAGCCCAAAATAGTTGGAAGATACATCAAATGGATGTCAAATCAGCTTTCTTACATAGAAACCTTGAGGAAGAAGTCTACATTGAGCAACCACAAGACTACATTGTCAAAGGAGAAGAAGACAAAGTCTTAAGGCTGAAGAAGACGCTTTATGGATTAAAGCAGGTACCAAAAGCATGGAACACTCGGATTGATAAGTACTTCAAGGAGAAGGACTTCATCAAGTGTCCATATGAGCATGCACTTTATATCAAAACCCAAAACAATGATATTCTGATTGCATGCTTGTATCTGGATGACTTGATATTCACCGGCAACAATCCGATTATGTTTGAAAATTTCAAGATGGGGATGACAAAGGAGTTCGAGATGACTAATATTGGATTGATGTCATACTACCTTGGAATTGAAGTAAAGAAAGAAGAAAGTGGAATCTTCATTACTCAAGAAGGCTATGTTAAAGAGGTGCTTAAGAAGTTCAAGATGGATGACTCAAATCCAGTTTGCACG

>brussels sprout20

ATGATACATGGGAGTTAGCTTCACTTCCAAATGGACACAAGGCAATTGGTGTGAAGTGGGCGTACAAGGCAAAGAAGAACTCTAAAGGAGAAGTTGAAAGGTACAAGGCAAGATTGGTGGCAAAAGGCTATAGTCAAAGAGCCGGGATCGACTATGATGAGGTATTTGCTCCAGTTGCTCGCTTAGAAACTGTTAGACTAATCATTTCATTGGCAGCCCAAAAGAGTTGGAGGATACATCAAATGGATGTAAAATCAGCCTTCTTAAATAGAAACCTTGAGGAAGAAGTCTACATTGAGCAACCACAAGGCTACATAGTCAAAGGAGAAGAAGACAAAGTCTTAAGGCTAAAGAAGACGCTTTATGGATTAAAGCAACCACCAAGAGCATGGAACACTCGGATTGATAAGTACATCAAGTAGAAATGCTTCATCAAGTGTCCATATGAGCATGTACTTTATATCAAAACTTAAAACAATGATATATTGATTGCATGCTTATATGTTGATGACTTAATATTCACTGGCAACAATCCGATTATGTTTGAAGATTTCAAGATGGAGATGACAAAGGAGTTCGAGATGACCGACATTGGATTGATGTCATACTACCTTGGCATTGAAGTAAAGCAAGAAGAAAATGGAATCTTCATTACTCAAGAAGGTTATGCTAAGGAGGTGCTTAAGAAGTTCAAGATGGATGACTCAAATCCAGTTTGCACG

>brussels sprout21

ATGATACATGGGAGTTAGCTTCACTTCCAAATGGACACAAGGCAATTGGTGTGAAGTGGGTGTACAAGGCAAAGAAGAACTTTAAAGGAGAAGTTGAAAGGTACAAGGCAAGATTGGTGGCAAAAGGCTATAGTCAAAGAGCCGGGATCGACTATGATGAGGTATTTGCTCCAGTTGCTCGCTTAGAAATGGTTAGACTAATCATTTCATTGGCAGCCCAAAAGAGTTGGAGGATACATCAAATGGATGTCAAATCAGCCTTCTTAAATGGAGACCTTGAGGAAGAAGTCTACATTGAGCAACCACAAGGCTACATAGTTAAGGGAGAAGAAGACAAAGTCTTAAGACTGAAGAAGGCGCTTTATGGATTAAAGCAAGCACCAAGAGCATGGAACACTCGGATTGATAAGTACTTCAAGGAGAAAGGCTTCATCAAGTGTCCATATGAGCATGCACTTTATATCAAAACTCAAAACAATGATATATTGATTACATGCTTATATGTTGATGACTTGATATCCACTGGCAACAATCCGATTATGTTTGAAGATTTCAAGATGGAGATGACAAAGGAGTTTGAGATGACCGACATTGGATTAATGTCATACTACCTTGGCATTGAAGTAAAGCAAGAAGAAAATGGAATCTTCATTAGTCAAGAAGGTTATGCTAAAGAGGTGCTTAAGAAGTTCAAGATGGGTGACTCAAACCCAGTTTGCACG

>brussels sprout22

ATGATACATGGAAGTTAGCTTCACTTCCAAATGGACACAAGGCAATTGGTGTGAAGTGGGTGTACAAGGCAAAGAAGAACTCTAAAGGAGAACTTGAAAGGTACAAGGCAAGATTGGTGGCAAAAGGCTATAGTCAAAGAGCCGGGATCGACTATGATGAGATATTTGCTCCAGTTGCTCGCTTAGAAACGGTTAGACTAATCATTTCGTTGGCAGCCCAAAAGAGTTGGAGGATACAACAAATGGATGTAAAATCAGCCTTCTTAAATGGAGACCTTGAGGAAGAAGTCTACATTGAGCAACCACAAGGCTACATAGTCAAAGGAGAAGAAGACAAAGTCTTAAGGCTGAAGAAGGCCCTTTATGGATTAAAGCAAGCACCAAGAGCATGGAACACTCGAATTCATAAGTACTTCAAGGAGAAAGGCTTCATCAAGTGTCCATATGAGCATGTACTTTATATCAAAACTCAAAACAATGATATATTGATTGCATGCTTATATGTTGATGACTTGATATTCACTGGCAACAATCCGATTATGTTTGAAGATTTCAAGATGGAGATGACAAAGGAGTTCGAGATGACCGACATTGGATTGATGTCATACTACCTTGGCATTGAAGTAAAGCAAGAAGAAAATGGAATCTTCATTACTCAAGAAGGCTATGCTAAAGAGGTGCTTAAGAAGCTCAAGATGGATGACTCAAATCCAGTTTGCACG

Supplementary Figure 2. A reverse transcriptase (RT) of *OLE* from the genome of cruciferous vegetables.
