# Supplementary material for: Epigenetic Regulation of A Heat-Activated Retrotransposon in Cruciferous Vegetables
Source: Preprints.org preprint supplement (doi:10.20944/preprints201705.0022.v1), 2017-05-02
Supplement: Supplementary file 2 [file Supplementary Table 1.docx]

Supplementary Table 1. Primer sequences.

Target/Purpose Name Primer

Southern probe At1g11270-3*-F ATA TAT CAC CCG ATG TCC CCA

At1G11265-3*-R AAT CGC TTG TGC GTT TCT GA

q-RT-PCR COPIA78_4129F_RT CCA CAA GAG GAA CCA ACG AA

COPIA_4300R_RT TTC GAT CAT GGA AGA CCG G

18Sr_FW CGT CCC TGC CCT TTG TAC AC

18Sr-RV CGA ACA CTT CAC CGG ATC ATT

Cloning of *RT* ONSEN_RVT2-F TGT TTA TTT GCG GAG TGC GA

in cruciferous ONSEN_RVT2-R AAA TAT CGG GCC TTG TGC AT

vegetables
